# Supplementary material
Source: publisher figshare collection journal article supplement (https://gsapubs.figshare.com/ndownloader/files/22744820)
Supplement: Supplementary file 1 [file 22744820]

GSA Data Repository Table 1: Field data for Crack and Rock characteristics. See text of manuscript for

<sup>1</sup>Each clast was assigned a unique number for each field trip. Letters indicate a different crack-set or c<sup>2</sup> Crack Width (mm) : i = <.1; t = .1-1; m = 1-3; l = 3+<sup>3</sup> Crack type: B = longitudinal; J = planar surface-parallel; F = fabric; O = other; M = meridional<sup>4</sup> Encircles stone 1 =  2 =  3 =  =  = separated<sup>5</sup> Unless otherwise noted, crack dip was 90° +/- 30°

--- = data not collected for this property

|                | Clast<br>Number <sup>1</sup> | Age of<br>Surface | Rock<br>Type    | Clast<br>Width<br>(cm) | Clast<br>Length<br>(cm) |
|----------------|------------------------------|-------------------|-----------------|------------------------|-------------------------|
| Site 1         | 1                            | Late Pleistocene  | basalt          | 13                     | 17                      |
| Angela's Flow  | 2                            | Late Pleistocene  | basalt          | 10                     | 15.5                    |
| Cima           | 3                            | Late Pleistocene  | basalt          | 12                     | 14                      |
|                | 4                            | Late Pleistocene  | basalt          | 22                     | 31                      |
|                | 5                            | Late Pleistocene  | basalt          | 21                     | 28.5                    |
|                | 6                            | Late Pleistocene  | basalt          | 17                     | 28                      |
|                | 7                            | Late Pleistocene  | basalt          | 24                     | 30                      |
|                | 8                            | Late Pleistocene  | basalt          | 18                     | 31                      |
|                | 9                            | Late Pleistocene  | basalt          | 14.5                   | 25.5                    |
|                | 10                           | Late Pleistocene  | basalt          | 10                     | 11                      |
|                | 11                           | Late Pleistocene  | basalt          | 5                      | 8.5                     |
|                | 12                           | Late Pleistocene  | basalt          | 32                     | 34                      |
|                | 13                           | Late Pleistocene  | basalt          | 8                      | 9                       |
|                | 14                           | Late Pleistocene  | basalt          | 6                      | 6                       |
|                | 15                           | Late Pleistocene  | basalt          | 8                      | 10                      |
|                | 16                           | Late Pleistocene  | basalt          | 6.5                    | 14                      |
|                | 17                           | Late Pleistocene  | basalt          | 9                      | 14                      |
|                | 18                           | Late Pleistocene  | basalt          | 8                      | 12.5                    |
|                | 19                           | Late Pleistocene  | basalt          | 8                      | 12                      |
|                | 20                           | Late Pleistocene  | basalt          | 6                      | 7                       |
|                | 21                           | Late Pleistocene  | basalt          | 18                     | 34                      |
|                | 22                           | Late Pleistocene  | basalt          | 19                     | 24                      |
|                | 23                           | Late Pleistocene  | basalt          | 14                     | 22                      |
|                | 25                           | Late Pleistocene  | basalt          | 23                     | 38                      |
|                | 26                           | Late Pleistocene  | basalt          | 20                     | 38                      |
|                | 27a                          | Late Pleistocene  | basalt          | 22                     | 31                      |
|                | 27b                          | Late Pleistocene  | basalt          | 22                     | 31                      |
|                | 28                           | Late Pleistocene  | basalt          | 13.5                   | 19                      |
| Site 2         | 1a                           | Early Holocene    | gneiss          | 30                     | 77                      |
| McDonald's     | 1b                           | Early Holocene    | gneiss          | 30                     | 77                      |
| VX Fans        | 2a                           | Early Holocene    | metasedimentary | 34                     | 51                      |
| Providence Mtn | 2b                           | Early Holocene    | metasedimentary | 34                     | 51                      |
|                | 3a                           | Early Holocene    | volcanic        | 18                     | 35                      |
|                | 3b                           | Early Holocene    | volcanic        | 18                     | 35                      |
|                | 4a                           | Early Holocene    | volcanic        | 33                     | 44                      |
|                | 4b                           | Early Holocene    | volcanic        | 33                     | 44                      |
|                | 5                            | Early Holocene    | granite         | 30                     | 33                      |
|                | 6a                           | Early Holocene    | limestone       | 37                     | 40                      |
|                | 6b                           | Early Holocene    | limestone       | 37                     | 40                      |

Data Repository item 2005026

|                |     |                |           |      |      |
|----------------|-----|----------------|-----------|------|------|
|                | 7a  | Early Holocene | volcanic  | 16   | 31   |
|                | 7b  | Early Holocene | volcanic  | 16   | 31   |
|                | 8a  | Early Holocene | limestone | 28   | 37   |
|                | 8b  | Early Holocene | limestone | 28   | 37   |
|                | 9   | Early Holocene | granite   | 18   | 25   |
|                | 10a | Early Holocene | limestone | 18   | 22   |
|                | 10b | Early Holocene | limestone | 18   | 22   |
|                | 11a | Early Holocene | volcanic  | 27   | 35   |
|                | 11b | Early Holocene | volcanic  | 27   | 35   |
|                | 12a | Early Holocene | granite   | 50   | 54   |
|                | 12b | Early Holocene | granite   | 50   | 54   |
|                | 12c | Early Holocene | granite   | 50   | 54   |
|                | 13  | Early Holocene | volcanic  | 18   | 40   |
|                | 14a | Early Holocene | granite   | 12   | 15   |
|                | 14b | Early Holocene | granite   | 12   | 15   |
|                | 15a | Early Holocene | granite   | 12   | 34   |
|                | 15b | Early Holocene | granite   | 12   | 34   |
|                | 16a | Early Holocene | granite   | 21   | 49   |
|                | 16b | Early Holocene | granite   | 21   | 49   |
|                | 16c | Early Holocene | granite   | 21   | 49   |
|                | 17a | Early Holocene | granite   | 21   | 36   |
|                | 17b | Early Holocene | granite   | 21   | 36   |
|                | 17c | Early Holocene | granite   | 21   | 36   |
|                | 17d | Early Holocene | granite   | 21   | 36   |
|                | 18a | Early Holocene | mvolcanic | 31   | 60   |
|                | 18b | Early Holocene | mvolcanic | 31   | 60   |
|                | 18c | Early Holocene | mvolcanic | 31   | 60   |
|                | 19a | Early Holocene | volcanic  | 20   | 35   |
|                | 19b | Early Holocene | volcanic  | 20   | 35   |
| Site 3         | 1a  | Early Holocene | granite   | 36   | 57   |
| Eric's         | 1b  | Early Holocene | granite   | 36   | 57   |
| QM-QF6         | 2   | Early Holocene | granite   | 10   | 11.5 |
| Providence Mtn | 3   | Early Holocene | granite   | 13.5 | 15.5 |
|                | 4   | Early Holocene | granite   | 12   | 34   |
|                | 5   | Early Holocene | granite   | 13   | 20   |
|                | 6   | Early Holocene | granite   | 12   | 25   |
|                | 7   | Early Holocene | granite   | 5    | 5    |
|                | 8   | Early Holocene | granite   | 29   | 39   |
|                | 9a  | Early Holocene | granite   | 23   | 40   |
|                | 9b  | Early Holocene | granite   | 23   | 40   |
|                | 10a | Early Holocene | granite   | 11   | 26   |
|                | 10b | Early Holocene | granite   | 11   | 26   |
|                | 11  | Early Holocene | granite   | 12   | 30   |
|                | 12  | Early Holocene | granite   | 10   | 29   |
|                | 13a | Early Holocene | granite   | 36   | 37   |
|                | 13b | Early Holocene | granite   | 36   | 37   |
|                | 14a | Early Holocene | granite   | 30   | 46   |
|                | 14b | Early Holocene | granite   | 30   | 46   |
|                | 15a | Early Holocene | granite   | 29   | 44   |
|                | 15b | Early Holocene | granite   | 29   | 44   |
|                | 16  | Early Holocene | granite   | 34   | 11   |
|                | 17  | Early Holocene | granite   | 27   | 40   |

Data Repository item 2005026

|                                                    |     |                         |           |      |      |
|----------------------------------------------------|-----|-------------------------|-----------|------|------|
| Site 4<br>Continuation of<br>Angela's Flow<br>Cima | 18  | Early Holocene          | granite   | 24   | 57   |
|                                                    | 19  | Early Holocene          | granite   | 59   | 91   |
|                                                    | 20a | Early Holocene          | granite   | 45   | 57   |
|                                                    | 20b | Early Holocene          | granite   | 45   | 57   |
|                                                    | 21  | Early Holocene          | granite   | 13   | 17   |
|                                                    | 22a | Early Holocene          | granite   | 20   | 30   |
|                                                    | 22b | Early Holocene          | granite   | 20   | 30   |
|                                                    | 1   | Late Pleistocene        | basalt    | 4.5  | 6    |
|                                                    | 2   | Late Pleistocene        | basalt    | 6    | 8    |
|                                                    | 3   | Late Pleistocene        | basalt    | 9    | 9.5  |
|                                                    | 4   | Late Pleistocene        | basalt    | 10   | 16   |
|                                                    | 5   | Late Pleistocene        | basalt    | 16   | 21   |
|                                                    | 6   | Late Pleistocene        | basalt    | 19   | 24   |
|                                                    | 7   | Late Pleistocene        | basalt    | 3.5  | 11   |
|                                                    | 8a  | Late Pleistocene        | basalt    | 12   | 14.5 |
|                                                    | 8b  | Late Pleistocene        | basalt    | 12   | 14.5 |
|                                                    | 9   | Late Pleistocene        | basalt    | 7.5  | 12   |
|                                                    | 10  | Late Pleistocene        | basalt    | 16.5 | 22   |
|                                                    | 11  | Late Pleistocene        | basalt    | 6    | 9    |
|                                                    | 12  | Late Pleistocene        | basalt    | 19   | 28   |
|                                                    | 13  | Late Pleistocene        | basalt    | 10   | 15   |
|                                                    | 14  | Late Pleistocene        | basalt    | 12   | 21   |
|                                                    | 15  | Late Pleistocene        | basalt    | 8    | 17   |
|                                                    | 16  | Late Pleistocene        | basalt    | 13   | 14   |
|                                                    | 17  | Late Pleistocene        | basalt    | 8    | 11   |
|                                                    | 18  | Late Pleistocene        | basalt    | 7    | 11.5 |
|                                                    | 19  | Late Pleistocene        | basalt    | 13   | 13.5 |
|                                                    | 20  | Late Pleistocene        | basalt    | 13   | 16   |
|                                                    | 21  | Late Pleistocene        | basalt    | 27   | 28   |
|                                                    | 22  | Late Pleistocene        | basalt    | 9    | 10   |
|                                                    | 23  | Late Pleistocene        | basalt    | 7    | 10   |
|                                                    | 24  | Late Pleistocene        | basalt    | 5    | 11   |
| Site 5<br>Palo Duro                                | 1   | Middle to Late Holocene | quartzite | 10   | 13   |
|                                                    | 2a  | Middle to Late Holocene | quartzite | 27   | 34   |
|                                                    | 2b  | Middle to Late Holocene | quartzite | 27   | 34   |
|                                                    | 3   | Middle to Late Holocene | volcanic  | 10   | 13   |
|                                                    | 4   | Middle to Late Holocene | limestone | 14   | 17   |
|                                                    | 5a  | Middle to Late Holocene | basalt    | 70   | 110  |
|                                                    | 5b  | Middle to Late Holocene | basalt    | 70   | 110  |
|                                                    | 6a  | Middle to Late Holocene | granite   | 16   | 27   |
|                                                    | 6b  | Middle to Late Holocene | granite   | 16   | 27   |
|                                                    | 7   | Middle to Late Holocene | sandstone | 11   | 20   |
|                                                    | 8a  | Middle to Late Holocene | sandstone | 22   | 36   |
|                                                    | 8b  | Middle to Late Holocene | sandstone | 22   | 36   |
|                                                    | 9   | Middle to Late Holocene | limestone | 24   | 34   |
|                                                    | 10  | Middle to Late Holocene | basalt    | 14   | 31   |
|                                                    | 11a | Middle to Late Holocene | volcanic  | 19   | 21   |
|                                                    | 11b | Middle to Late Holocene | volcanic  | 19   | 21   |
|                                                    | 12  | Middle to Late Holocene | basalt    | 16   | 26   |
|                                                    | 13a | Middle to Late Holocene | sandstone | 20   | 28   |
|                                                    | 13b | Middle to Late Holocene | sandstone | 20   | 28   |
|                                                    | 14  | Middle to Late Holocene | basalt    | 36   | 50   |

Data Repository item 2005026

|                |     |                         |             |    |     |
|----------------|-----|-------------------------|-------------|----|-----|
|                | 15  | Middle to Late Holocene | limestone   | 12 | 19  |
|                | 16a | Middle to Late Holocene | mvolcanic   | 17 | 88  |
|                | 16b | Middle to Late Holocene | mvolcanic   | 17 | 88  |
|                | 17  | Middle to Late Holocene | sandstone   | 11 | 27  |
|                | 18a | Middle to Late Holocene | limestone   | 28 | 51  |
|                | 18b | Middle to Late Holocene | limestone   | 28 | 51  |
|                | 18c | Middle to Late Holocene | limestone   | 28 | 51  |
|                | 19a | Middle to Late Holocene | limestone   | 16 | 30  |
|                | 19b | Middle to Late Holocene | limestone   | 16 | 30  |
|                | 19c | Middle to Late Holocene | limestone   | 16 | 30  |
|                | 20a | Middle to Late Holocene | limestone   | 10 | 12  |
|                | 20b | Middle to Late Holocene | limestone   | 10 | 12  |
|                | 21  | Middle to Late Holocene | mvolcanic   | 10 | 22  |
|                | 22  | Middle to Late Holocene | sandstone   | 4  | 22  |
|                | 23a | Middle to Late Holocene | basalt      | 37 | 54  |
|                | 23b | Middle to Late Holocene | basalt      | 37 | 54  |
|                | 24a | Middle to Late Holocene | sandstone   | 23 | 28  |
|                | 24b | Middle to Late Holocene | sandstone   | 23 | 28  |
|                | 25  | Middle to Late Holocene | basalt      | 12 | 27  |
|                | 26  | Middle to Late Holocene | gneiss      | 23 | 40  |
|                | 27a | Middle to Late Holocene | granite     | 27 | 39  |
|                | 27b | Middle to Late Holocene | granite     | 27 | 39  |
|                | 27c | Middle to Late Holocene | granite     | 27 | 39  |
|                | 28  | Middle to Late Holocene | basalt      | 14 | 27  |
|                | 29  | Middle to Late Holocene | sandstone   | 14 | 27  |
|                | 30a | Middle to Late Holocene | sandstone   | 11 | 16  |
|                | 30b | Middle to Late Holocene | sandstone   | 11 | 16  |
|                | 31a | Middle to Late Holocene | sandstone   | 7  | 23  |
|                | 31b | Middle to Late Holocene | sandstone   | 7  | 23  |
|                | 32  | Middle to Late Holocene | limestone   | 17 | 22  |
|                | 33a | Middle to Late Holocene | limestone   | 13 | 17  |
|                | 33b | Middle to Late Holocene | limestone   | 13 | 17  |
|                | 34  | Middle to Late Holocene | basalt      | 12 | 22  |
| Site 6         | 1a  | Early Holocene          | granite     | 20 | 43  |
| San Bernardino | 1b  | Early Holocene          | granite     | 20 | 43  |
|                | 2   | Early Holocene          | granite     | 24 | 48  |
|                | 3   | Early Holocene          | granite     | 39 | 46  |
|                | 4a  | Early Holocene          | limestone   | 36 | 47  |
|                | 4b  | Early Holocene          | limestone   | 36 | 47  |
|                | 5a  | Early Holocene          | granite     | 58 | 73  |
|                | 5b  | Early Holocene          | granite     | 58 | 73  |
|                | 6a  | Early Holocene          | gneiss      | 31 | 36  |
|                | 6b  | Early Holocene          | gneiss      | 31 | 36  |
|                | 7   | Early Holocene          | granite     | 44 | 43  |
|                | 8a  | Early Holocene          | granite     | 80 | 130 |
|                | 8b  | Early Holocene          | granite     | 80 | 130 |
|                | 9a  | Early Holocene          | gneiss      | 70 | 110 |
|                | 9b  | Early Holocene          | gneiss      | 70 | 110 |
|                | 9c  | Early Holocene          | gneiss      | 70 | 110 |
|                | 10a | Early Holocene          | granite     | 65 | 108 |
|                | 10b | Early Holocene          | granite     | 65 | 108 |
|                | 11a | Early Holocene          | metagranite | 86 | 143 |

|                                              |     |                             |                 |    |     |
|----------------------------------------------|-----|-----------------------------|-----------------|----|-----|
| Site 7<br>Harrison<br>LTER west<br>Sevilleta | 11b | Early Holocene              | metagranite     | 86 | 143 |
|                                              | 12a | Early Holocene              | metagranite     | 50 | 80  |
|                                              | 12b | Early Holocene              | metagranite     | 50 | 80  |
|                                              | 13  | Early Holocene              | metagranite     | 53 | 100 |
|                                              | 14a | Early Holocene              | granite         | 74 | 93  |
|                                              | 14b | Early Holocene              | granite         | 74 | 93  |
|                                              | 14c | Early Holocene              | granite         | 74 | 93  |
|                                              | 15a | Early Holocene              | granite         | 46 | 80  |
|                                              | 15b | Early Holocene              | granite         | 46 | 80  |
|                                              | 16a | Early Holocene              | gneiss          | 33 | 84  |
|                                              | 16b | Early Holocene              | gneiss          | 33 | 84  |
|                                              | 17a | Early Holocene              | granite         | 56 | 59  |
|                                              | 17b | Early Holocene              | granite         | 56 | 59  |
|                                              | 17c | Early Holocene              | granite         | 56 | 59  |
|                                              | 18a | Early Holocene              | gneiss          | 25 | 23  |
|                                              | 18b | Early Holocene              | gneiss          | 25 | 23  |
|                                              | 19  | Early Holocene              | metagranite     | 44 | 52  |
|                                              | 20  | Early Holocene              | granite         | 53 | 90  |
|                                              | 21  | Early Holocene              | granite         | 65 | 74  |
|                                              | 22a | Early Holocene              | granite         | 62 | 80  |
|                                              | 22b | Early Holocene              | granite         | 62 | 80  |
|                                              | 23a | Early Holocene              | metagranite     | 47 | 88  |
|                                              | 23b | Early Holocene              | metagranite     | 47 | 88  |
|                                              | 23c | Early Holocene              | metagranite     | 47 | 88  |
|                                              | 24a | Early Holocene              | granite         | 48 | 57  |
|                                              | 24b | Early Holocene              | granite         | 48 | 57  |
|                                              | 1   | Early Holocene              | quartzite       | 19 | 30  |
|                                              | 2a  | Early to Middle Pleistocene | quartzite       | 17 | 24  |
|                                              | 2b  | Early to Middle Pleistocene | quartzite       | 17 | 24  |
|                                              | 3   | Early to Middle Pleistocene | quartzite       | 14 | 22  |
|                                              | 4a  | Early to Middle Pleistocene | quartzite       | 19 | 24  |
|                                              | 4b  | Early to Middle Pleistocene | quartzite       | 19 | 24  |
|                                              | 5   | Early to Middle Pleistocene | quartzite       | 12 | 27  |
|                                              | 6a  | Early to Middle Pleistocene | quartzite       | 15 | 34  |
|                                              | 6b  | Early to Middle Pleistocene | quartzite       | 15 | 34  |
|                                              | 7a  | Early to Middle Pleistocene | quartzite       | 8  | 22  |
|                                              | 7b  | Early to Middle Pleistocene | quartzite       | 8  | 22  |
|                                              | 8a  | Early to Middle Pleistocene | metasedimentary | 26 | 32  |
|                                              | 8b  | Early to Middle Pleistocene | metasedimentary | 26 | 32  |
|                                              | 9a  | Early to Middle Pleistocene | metasedimentary | 44 | 77  |
|                                              | 9b  | Early to Middle Pleistocene | metasedimentary | 44 | 77  |
|                                              | 9c  | Early to Middle Pleistocene | metasedimentary | 44 | 77  |
|                                              | 10a | Early to Middle Pleistocene | quartzite       | 40 | 60  |
|                                              | 10b | Early to Middle Pleistocene | quartzite       | 40 | 60  |
|                                              | 11  | Early to Middle Pleistocene | quartzite       | 14 | 22  |
|                                              | 12a | Early to Middle Pleistocene | quartzite       | 32 | 31  |
|                                              | 12b | Early to Middle Pleistocene | quartzite       | 32 | 31  |
|                                              | 12c | Early to Middle Pleistocene | quartzite       | 32 | 31  |
|                                              | 13a | Early to Middle Pleistocene | quartzite       | 45 | 49  |
|                                              | 13b | Early to Middle Pleistocene | quartzite       | 45 | 49  |
|                                              | 14a | Early to Middle Pleistocene | quartzite       | 30 | 57  |
|                                              | 14b | Early to Middle Pleistocene | quartzite       | 30 | 57  |

Data Repository item 2005026

|                                  |     |                             |                 |    |    |
|----------------------------------|-----|-----------------------------|-----------------|----|----|
| Site 8<br>Los Pinos<br>West side | 15a | Early to Middle Pleistocene | quartzite       | 19 | 21 |
|                                  | 15b | Early to Middle Pleistocene | quartzite       | 19 | 21 |
|                                  | 16a | Early to Middle Pleistocene | metasedimentary | 17 | 30 |
|                                  | 16b | Early to Middle Pleistocene | metasedimentary | 17 | 30 |
|                                  | 17a | Early to Middle Pleistocene | quartzite       | 34 | 58 |
|                                  | 17b | Early to Middle Pleistocene | quartzite       | 34 | 58 |
|                                  | 18a | Early to Middle Pleistocene | quartzite       | 47 | 49 |
|                                  | 18b | Early to Middle Pleistocene | quartzite       | 47 | 49 |
|                                  | 19a | Early to Middle Pleistocene | quartzite       | 37 | 79 |
|                                  | 19b | Early to Middle Pleistocene | quartzite       | 37 | 79 |
|                                  | 19c | Early to Middle Pleistocene | quartzite       | 37 | 79 |
|                                  | 20a | Early to Middle Pleistocene | quartzite       | 31 | 66 |
|                                  | 20b | Early to Middle Pleistocene | quartzite       | 31 | 66 |
|                                  | 21a | Early to Middle Pleistocene | quartzite       | 33 | 45 |
|                                  | 21b | Early to Middle Pleistocene | quartzite       | 33 | 45 |
|                                  | 22  | Early to Middle Pleistocene | quartzite       | 34 | 55 |
|                                  | 23  | Early to Middle Pleistocene | metasedimentary | 21 | 25 |
|                                  | 1   | Early to Middle Pleistocene | granite         | 44 | 50 |
|                                  | 2   | Early Holocene              | granite         | 36 | 41 |
|                                  | 3a  | Early Holocene              | granite         | 43 | 44 |
|                                  | 3b  | Early Holocene              | granite         | 43 | 44 |
|                                  | 4a  | Early Holocene              | granite         | 56 | 62 |
|                                  | 4b  | Early Holocene              | granite         | 56 | 62 |
|                                  | 5a  | Early Holocene              | granite         | 53 | 73 |
|                                  | 5b  | Early Holocene              | granite         | 53 | 73 |
|                                  | 6a  | Early Holocene              | granite         | 47 | 62 |
|                                  | 6b  | Early Holocene              | granite         | 47 | 62 |
|                                  | 7a  | Early Holocene              | granite         | 36 | 42 |
|                                  | 7b  | Early Holocene              | granite         | 36 | 42 |
|                                  | 8a  | Early Holocene              | granite         | 40 | 57 |
|                                  | 8b  | Early Holocene              | granite         | 40 | 57 |
|                                  | 8c  | Early Holocene              | granite         | 40 | 57 |
|                                  | 9a  | Early Holocene              | granite         | 41 | 57 |
|                                  | 9b  | Early Holocene              | granite         | 41 | 57 |
|                                  | 9c  | Early Holocene              | granite         | 41 | 57 |
|                                  | 10a | Early Holocene              | granite         | 32 | 57 |
|                                  | 10b | Early Holocene              | granite         | 32 | 57 |
|                                  | 10c | Early Holocene              | granite         | 32 | 57 |
|                                  | 11a | Early Holocene              | granite         | 56 | 59 |
|                                  | 11b | Early Holocene              | granite         | 56 | 59 |
|                                  | 11c | Early Holocene              | granite         | 56 | 59 |
|                                  | 12a | Early Holocene              | volcanic        | 52 | 55 |
|                                  | 12b | Early Holocene              | volcanic        | 52 | 55 |
|                                  | 13a | Early Holocene              | granite         | 30 | 77 |
|                                  | 13b | Early Holocene              | granite         | 30 | 77 |
|                                  | 14a | Early Holocene              | granite         | 71 | 84 |
|                                  | 14b | Early Holocene              | granite         | 71 | 84 |
|                                  | 14c | Early Holocene              | granite         | 71 | 84 |
|                                  | 15a | Early Holocene              | granite         | 53 | 87 |
|                                  | 15b | Early Holocene              | granite         | 53 | 87 |
|                                  | 15c | Early Holocene              | granite         | 53 | 87 |
|                                  | 16a | Early Holocene              | metagranite     | 42 | 53 |

|     |                |             |    |     |
|-----|----------------|-------------|----|-----|
| 16b | Early Holocene | metagranite | 42 | 53  |
| 17  | Early Holocene | granite     | 39 | 87  |
| 18  | Early Holocene | granite     | 42 | 62  |
| 19a | Early Holocene | granite     | 50 | 114 |
| 19b | Early Holocene | granite     | 50 | 114 |
| 20  | Early Holocene | granite     | 54 | 68  |
| 21a | Early Holocene | granite     | 66 | 68  |
| 21b | Early Holocene | granite     | 66 | 68  |
| 22  | Early Holocene | granite     | 85 | 104 |
| 23a | Early Holocene | granite     | 45 | 58  |
| 23b | Early Holocene | granite     | 45 | 58  |
| 23c | Early Holocene | granite     | 45 | 58  |
| 24  | Early Holocene | granite     | 34 | 67  |
| 25a | Early Holocene | granite     | 42 | 60  |
| 25b | Early Holocene | granite     | 42 | 60  |
| 26  | Early Holocene | granite     | 47 | 69  |
| 27  | Early Holocene | granite     | 38 | 60  |
| 28a | Early Holocene | metagranite | 44 | 49  |
| 28b | Early Holocene | metagranite | 44 | 49  |
| 28c | Early Holocene | metagranite | 44 | 49  |
| 29  | Early Holocene | granite     | 52 | 83  |
| 30a | Early Holocene | granite     | 71 | 78  |
| 30b | Early Holocene | granite     | 71 | 78  |
| 31a | Early Holocene | granite     | 33 | 52  |
| 31b | Early Holocene | granite     | 33 | 52  |
| 32a | Early Holocene | granite     | 66 | 80  |
| 32b | Early Holocene | granite     | 66 | 80  |
| 33a | Early Holocene | granite     | 40 | 42  |
| 33b | Early Holocene | granite     | 40 | 42  |
| 33c | Early Holocene | granite     | 40 | 42  |
| 34  | Early Holocene | granite     | 57 | 98  |
| 35a | Early Holocene | granite     | 62 | 101 |
| 35b | Early Holocene | granite     | 62 | 101 |
| 36a | Early Holocene | granite     | 54 | 60  |
| 36b | Early Holocene | granite     | 54 | 60  |
| 37a | Early Holocene | granite     | 42 | 63  |
| 37b | Early Holocene | granite     | 42 | 63  |
| 38a | Early Holocene | granite     | 45 | 52  |
| 38b | Early Holocene | granite     | 45 | 52  |
| 39a | Early Holocene | granite     | 46 | 54  |
| 39b | Early Holocene | granite     | 46 | 54  |
| 39c | Early Holocene | granite     | 46 | 54  |
| 40a | Early Holocene | granite     | 47 | 64  |
| 40b | Early Holocene | granite     | 47 | 64  |
| 41a | Early Holocene | gneiss      | 41 | 66  |
| 41b | Early Holocene | gneiss      | 41 | 66  |
| 41c | Early Holocene | gneiss      | 41 | 66  |
| 42a | Early Holocene | granite     | 58 | 66  |
| 42b | Early Holocene | granite     | 58 | 66  |
| 42c | Early Holocene | granite     | 58 | 66  |
| 43a | Early Holocene | granite     | 22 | 53  |
| 43b | Early Holocene | granite     | 22 | 53  |

Data Repository item 2005026

|                |     |                  |         |     |     |
|----------------|-----|------------------|---------|-----|-----|
|                | 44a | Early Holocene   | granite | 39  | 42  |
|                | 44b | Early Holocene   | granite | 39  | 42  |
|                | 45a | Early Holocene   | granite | 56  | 77  |
|                | 45b | Early Holocene   | granite | 56  | 77  |
|                | 45c | Early Holocene   | granite | 56  | 77  |
|                | 46  | Early Holocene   | granite | 58  | 70  |
|                | 47a | Early Holocene   | granite | 43  | 69  |
|                | 47b | Early Holocene   | granite | 43  | 69  |
|                | 48a | Early Holocene   | granite | 35  | 52  |
|                | 48b | Early Holocene   | granite | 35  | 52  |
|                | 49a | Early Holocene   | granite | 56  | 74  |
|                | 49b | Early Holocene   | granite | 56  | 74  |
|                | 49c | Early Holocene   | granite | 56  | 74  |
|                | 50a | Early Holocene   | granite | 38  | 47  |
|                | 50b | Early Holocene   | granite | 38  | 47  |
|                | 51a | Early Holocene   | granite | 86  | 99  |
|                | 51b | Early Holocene   | granite | 86  | 99  |
|                | 51c | Early Holocene   | granite | 86  | 99  |
|                | 52a | Early Holocene   | granite | 62  | 90  |
|                | 52b | Early Holocene   | granite | 62  | 90  |
|                | 53a | Early Holocene   | granite | 47  | 113 |
|                | 53b | Early Holocene   | granite | 47  | 113 |
|                | 53c | Early Holocene   | granite | 47  | 113 |
| Site 9         | 1a  | Late Pleistocene | granite | 86  | 114 |
| Sandia Mountai | 1b  | Late Pleistocene | granite | 86  | 114 |
| Piedmont       | 2a  | Late Pleistocene | granite | 54  | 68  |
| above Elrich   | 2b  | Late Pleistocene | granite | 54  | 68  |
|                | 3a  | Late Pleistocene | granite | 50  | 55  |
|                | 3b  | Late Pleistocene | granite | 50  | 55  |
|                | 3c  | Late Pleistocene | granite | 50  | 55  |
|                | 4a  | Late Pleistocene | granite | 34  | 48  |
|                | 4b  | Late Pleistocene | granite | 34  | 48  |
|                | 5   | Late Pleistocene | granite | 170 | 217 |
|                | 6a  | Late Pleistocene | granite | 43  | 90  |
|                | 6b  | Late Pleistocene | granite | 43  | 90  |
|                | 7a  | Late Pleistocene | granite | 100 | 180 |
|                | 7b  | Late Pleistocene | granite | 100 | 180 |
|                | 8a  | Late Pleistocene | granite | 70  | 90  |
|                | 8b  | Late Pleistocene | granite | 70  | 90  |
|                | 9a  | Late Pleistocene | granite | 44  | 92  |
|                | 9b  | Late Pleistocene | granite | 44  | 92  |
|                | 9c  | Late Pleistocene | granite | 44  | 92  |
|                | 10a | Late Pleistocene | granite | 70  | 160 |
|                | 10b | Late Pleistocene | granite | 70  | 160 |
|                | 11a | Late Pleistocene | granite | 87  | 90  |
|                | 11b | Late Pleistocene | granite | 87  | 90  |
|                | 11c | Late Pleistocene | granite | 87  | 90  |
|                | 11d | Late Pleistocene | granite | 87  | 90  |
|                | 12a | Late Pleistocene | granite | 90  | 107 |
|                | 12b | Late Pleistocene | granite | 90  | 107 |
|                | 13a | Late Pleistocene | granite | 60  | 68  |
|                | 13b | Late Pleistocene | granite | 60  | 68  |



Data Repository item 2005026

|                                |     |                  |              |    |    |
|--------------------------------|-----|------------------|--------------|----|----|
| Site 10<br>San Lorenzo<br>Wash | 13c | Late Pleistocene | granite      | 60 | 68 |
|                                | 1a  | Latest Holocene  | volcanic     | 18 | 32 |
|                                | 1b  | Latest Holocene  | volcanic     | 18 | 32 |
|                                | 2   | Latest Holocene  | conglomerate | 22 | 27 |
|                                | 3a  | Latest Holocene  | volcanic     | 17 | 25 |
|                                | 3b  | Latest Holocene  | volcanic     | 17 | 25 |
|                                | 3c  | Latest Holocene  | volcanic     | 17 | 25 |
|                                | 4a  | Latest Holocene  | volcanic     | 25 | 44 |
|                                | 4b  | Latest Holocene  | volcanic     | 25 | 44 |
|                                | 4c  | Latest Holocene  | volcanic     | 25 | 44 |
|                                | 4d  | Latest Holocene  | volcanic     | 25 | 44 |
|                                | 4e  | Latest Holocene  | volcanic     | 25 | 44 |
|                                | 5a  | Latest Holocene  | basalt       | 26 | 46 |
|                                | 5b  | Latest Holocene  | basalt       | 26 | 46 |
|                                | 5c  | Latest Holocene  | basalt       | 26 | 46 |
|                                | 5d  | Latest Holocene  | basalt       | 26 | 46 |
|                                | 6a  | Latest Holocene  | volcanic     | 20 | 28 |
|                                | 6b  | Latest Holocene  | volcanic     | 20 | 28 |
|                                | 6c  | Latest Holocene  | volcanic     | 20 | 28 |
|                                | 6d  | Latest Holocene  | volcanic     | 20 | 28 |
|                                | 7a  | Latest Holocene  | volcanic     | 14 | 21 |
|                                | 7b  | Latest Holocene  | volcanic     | 14 | 21 |
|                                | 7c  | Latest Holocene  | volcanic     | 14 | 21 |
|                                | 7d  | Latest Holocene  | volcanic     | 14 | 21 |
|                                | 8a  | Latest Holocene  | basalt       | 19 | 21 |
|                                | 8b  | Latest Holocene  | basalt       | 19 | 21 |
|                                | 8c  | Latest Holocene  | basalt       | 19 | 21 |
|                                | 9a  | Latest Holocene  | volcanic     | 15 | 21 |
|                                | 9b  | Latest Holocene  | volcanic     | 15 | 21 |
|                                | 10a | Latest Holocene  | volcanic     | 24 | 33 |
|                                | 10b | Latest Holocene  | volcanic     | 24 | 33 |
|                                | 10c | Latest Holocene  | volcanic     | 24 | 33 |
|                                | 11a | Latest Holocene  | volcanic     | 25 | 28 |
|                                | 11b | Latest Holocene  | volcanic     | 25 | 28 |
|                                | 11c | Latest Holocene  | volcanic     | 25 | 28 |
|                                | 12a | Latest Holocene  | volcanic     | 25 | 30 |
|                                | 12b | Latest Holocene  | volcanic     | 25 | 30 |
|                                | 12c | Latest Holocene  | volcanic     | 25 | 30 |
|                                | 12d | Latest Holocene  | volcanic     | 25 | 30 |
|                                | 13a | Latest Holocene  | conglomerate | 21 | 24 |
|                                | 13b | Latest Holocene  | conglomerate | 21 | 24 |
|                                | 14a | Latest Holocene  | conglomerate | 20 | 42 |
|                                | 14b | Latest Holocene  | conglomerate | 20 | 42 |
|                                | 15a | Latest Holocene  | conglomerate | 37 | 38 |
|                                | 15b | Latest Holocene  | conglomerate | 37 | 38 |
|                                | 15c | Latest Holocene  | conglomerate | 37 | 38 |
|                                | 16a | Latest Holocene  | volcanic     | 14 | 21 |
|                                | 16b | Latest Holocene  | volcanic     | 14 | 21 |
|                                | 17a | Latest Holocene  | volcanic     | 16 | 22 |
|                                | 17b | Latest Holocene  | volcanic     | 16 | 22 |
|                                | 18a | Latest Holocene  | conglomerate | 23 | 32 |
|                                | 18b | Latest Holocene  | conglomerate | 23 | 32 |

|     |                 |              |    |    |
|-----|-----------------|--------------|----|----|
| 19a | Latest Holocene | volcanic     | 28 | 29 |
| 19b | Latest Holocene | volcanic     | 28 | 29 |
| 19c | Latest Holocene | volcanic     | 28 | 29 |
| 19d | Latest Holocene | volcanic     | 28 | 29 |
| 20a | Latest Holocene | volcanic     | 19 | 26 |
| 20b | Latest Holocene | volcanic     | 19 | 26 |
| 20c | Latest Holocene | volcanic     | 19 | 26 |
| 21a | Latest Holocene | volcanic     | 20 | 25 |
| 21b | Latest Holocene | volcanic     | 20 | 25 |
| 21c | Latest Holocene | volcanic     | 20 | 25 |
| 22a | Latest Holocene | volcanic     | 29 | 34 |
| 22b | Latest Holocene | volcanic     | 29 | 34 |
| 22c | Latest Holocene | volcanic     | 29 | 34 |
| 23a | Latest Holocene | conglomerate | 35 | 49 |
| 23b | Latest Holocene | conglomerate | 35 | 49 |
| 23c | Latest Holocene | conglomerate | 35 | 49 |
| 23d | Latest Holocene | conglomerate | 35 | 49 |
| 24a | Latest Holocene | volcanic     | 15 | 23 |
| 24b | Latest Holocene | volcanic     | 15 | 23 |
| 25a | Latest Holocene | volcanic     | 14 | 22 |
| 25b | Latest Holocene | volcanic     | 14 | 22 |
| 25c | Latest Holocene | volcanic     | 14 | 22 |
| 26a | Latest Holocene | volcanic     | 29 | 48 |
| 26b | Latest Holocene | volcanic     | 29 | 48 |
| 26c | Latest Holocene | volcanic     | 29 | 48 |
| 27a | Latest Holocene | volcanic     | 16 | 21 |
| 27b | Latest Holocene | volcanic     | 16 | 21 |
| 28a | Latest Holocene | conglomerate | 17 | 23 |
| 28b | Latest Holocene | conglomerate | 17 | 23 |
| 28c | Latest Holocene | conglomerate | 17 | 23 |
| 29a | Latest Holocene | conglomerate | 28 | 45 |
| 29b | Latest Holocene | conglomerate | 28 | 45 |
| 29c | Latest Holocene | conglomerate | 28 | 45 |
| 30a | Latest Holocene | volcanic     | 16 | 26 |
| 30b | Latest Holocene | volcanic     | 16 | 26 |
| 30c | Latest Holocene | volcanic     | 16 | 26 |
| 30d | Latest Holocene | volcanic     | 16 | 26 |
| 30e | Latest Holocene | volcanic     | 16 | 26 |
| 31a | Latest Holocene | basalt       | 17 | 20 |
| 31b | Latest Holocene | basalt       | 17 | 20 |
| 32a | Latest Holocene | volcanic     | 16 | 29 |
| 32b | Latest Holocene | volcanic     | 16 | 29 |
| 32c | Latest Holocene | volcanic     | 16 | 29 |
| 33a | Latest Holocene | volcanic     | 30 | 30 |
| 33b | Latest Holocene | volcanic     | 30 | 30 |
| 33c | Latest Holocene | volcanic     | 30 | 30 |
| 34a | Latest Holocene | volcanic     | 25 | 40 |
| 34b | Latest Holocene | volcanic     | 25 | 40 |
| 34c | Latest Holocene | volcanic     | 25 | 40 |
| 35a | Latest Holocene | volcanic     | 21 | 26 |
| 35b | Latest Holocene | volcanic     | 21 | 26 |
| 35c | Latest Holocene | volcanic     | 21 | 26 |

|     |                 |              |    |     |
|-----|-----------------|--------------|----|-----|
| 36a | Latest Holocene | volcanic     | 35 | 60  |
| 36b | Latest Holocene | volcanic     | 35 | 60  |
| 36c | Latest Holocene | volcanic     | 35 | 60  |
| 37a | Latest Holocene | volcanic     | 23 | 35  |
| 37b | Latest Holocene | volcanic     | 23 | 35  |
| 37c | Latest Holocene | volcanic     | 23 | 35  |
| 38a | Latest Holocene | volcanic     | 27 | 52  |
| 38b | Latest Holocene | volcanic     | 27 | 52  |
| 38c | Latest Holocene | volcanic     | 27 | 52  |
| 38d | Latest Holocene | volcanic     | 27 | 52  |
| 39a | Latest Holocene | volcanic     | 18 | 27  |
| 39b | Latest Holocene | volcanic     | 18 | 27  |
| 39c | Latest Holocene | volcanic     | 18 | 27  |
| 40a | Latest Holocene | conglomerate | 80 | 115 |
| 40b | Latest Holocene | conglomerate | 80 | 115 |
| 40c | Latest Holocene | conglomerate | 80 | 115 |
| 40d | Latest Holocene | conglomerate | 80 | 115 |
| 41a | Latest Holocene | sandstone    | 25 | 30  |
| 41b | Latest Holocene | sandstone    | 25 | 30  |
| 42a | Latest Holocene | volcanic     | 21 | 37  |
| 42b | Latest Holocene | volcanic     | 21 | 37  |
| 42c | Latest Holocene | volcanic     | 21 | 37  |
| 43a | Latest Holocene | volcanic     | 25 | 31  |
| 43b | Latest Holocene | volcanic     | 25 | 31  |
| 43c | Latest Holocene | volcanic     | 25 | 31  |
| 44a | Latest Holocene | conglomerate | 40 | 50  |
| 44b | Latest Holocene | conglomerate | 40 | 50  |
| 44c | Latest Holocene | conglomerate | 40 | 50  |
| 45a | Latest Holocene | sandstone    | 23 | 33  |
| 45b | Latest Holocene | sandstone    | 23 | 33  |
| 46a | Latest Holocene | conglomerate | 25 | 30  |
| 46b | Latest Holocene | conglomerate | 25 | 30  |
| 47a | Latest Holocene | conglomerate | 26 | 45  |
| 47b | Latest Holocene | conglomerate | 26 | 45  |
| 48a | Latest Holocene | conglomerate | 34 | 46  |
| 48b | Latest Holocene | conglomerate | 34 | 46  |
| 48c | Latest Holocene | conglomerate | 34 | 46  |
| 49a | Latest Holocene | sandstone    | 25 | 42  |
| 49b | Latest Holocene | sandstone    | 25 | 42  |
| 49c | Latest Holocene | sandstone    | 25 | 42  |
| 50a | Latest Holocene | volcanic     | 25 | 29  |
| 50b | Latest Holocene | volcanic     | 25 | 29  |
| 50c | Latest Holocene | volcanic     | 25 | 29  |
| 51a | Latest Holocene | volcanic     | 19 | 27  |
| 51b | Latest Holocene | volcanic     | 19 | 27  |
| 51c | Latest Holocene | volcanic     | 19 | 27  |
| 52a | Latest Holocene | volcanic     | 22 | 23  |
| 52b | Latest Holocene | volcanic     | 22 | 23  |
| 53a | Latest Holocene | sandstone    | 43 | 51  |
| 53b | Latest Holocene | sandstone    | 43 | 51  |
| 53c | Latest Holocene | sandstone    | 43 | 51  |
| 54a | Latest Holocene | volcanic     | 21 | 30  |

Data Repository item 2005026

|                                        |     |                    |             |    |    |
|----------------------------------------|-----|--------------------|-------------|----|----|
| Site 11<br>Harquakala<br>Eagle Eye Fan | 54b | Latest Holocene    | volcanic    | 21 | 30 |
|                                        | 54c | Latest Holocene    | volcanic    | 21 | 30 |
|                                        | 55a | Latest Holocene    | volcanic    | 37 | 47 |
|                                        | 55b | Latest Holocene    | volcanic    | 37 | 47 |
|                                        | 55c | Latest Holocene    | volcanic    | 37 | 47 |
|                                        | 1a  | Latest Holocene    | granite     | 25 | 32 |
|                                        | 1b  | Early-Mid Holocene | granite     | 25 | 32 |
|                                        | 2   | Early-Mid Holocene | granite     | 26 | 35 |
|                                        | 3a  | Early-Mid Holocene | granite     | 45 | 89 |
|                                        | 3b  | Early-Mid Holocene | granite     | 45 | 89 |
|                                        | 4   | Early-Mid Holocene | gneiss      | 35 | 46 |
|                                        | 5a  | Early-Mid Holocene | granite     | 18 | 34 |
|                                        | 5b  | Early-Mid Holocene | granite     | 18 | 34 |
|                                        | 5c  | Early-Mid Holocene | granite     | 18 | 34 |
|                                        | 5d  | Early-Mid Holocene | granite     | 18 | 34 |
|                                        | 6a  | Early-Mid Holocene | granite     | 36 | 54 |
|                                        | 6b  | Early-Mid Holocene | granite     | 36 | 54 |
|                                        | 6c  | Early-Mid Holocene | granite     | 36 | 54 |
|                                        | 6d  | Early-Mid Holocene | granite     | 36 | 54 |
|                                        | 7a  | Early-Mid Holocene | metagranite | 24 | 31 |
|                                        | 7b  | Early-Mid Holocene | metagranite | 24 | 31 |
|                                        | 7c  | Early-Mid Holocene | metagranite | 24 | 31 |
|                                        | 8a  | Early-Mid Holocene | metagranite | 40 | 37 |
|                                        | 8b  | Early-Mid Holocene | metagranite | 40 | 37 |
|                                        | 8c  | Early-Mid Holocene | metagranite | 40 | 37 |
|                                        | 8d  | Early-Mid Holocene | metagranite | 40 | 37 |
|                                        | 9a  | Early-Mid Holocene | granite     | 22 | 42 |
|                                        | 9b  | Early-Mid Holocene | granite     | 22 | 42 |
|                                        | 9c  | Early-Mid Holocene | granite     | 22 | 42 |
|                                        | 10a | Early-Mid Holocene | granite     | 30 | 32 |
|                                        | 10b | Early-Mid Holocene | granite     | 30 | 32 |
|                                        | 11a | Early-Mid Holocene | granite     | 37 | 52 |
|                                        | 11b | Early-Mid Holocene | granite     | 37 | 52 |
|                                        | 11c | Early-Mid Holocene | granite     | 37 | 52 |
|                                        | 11d | Early-Mid Holocene | granite     | 37 | 52 |
|                                        | 11e | Early-Mid Holocene | granite     | 37 | 52 |
|                                        | 12a | Early-Mid Holocene | gneiss      | 10 | 34 |
|                                        | 12b | Early-Mid Holocene | gneiss      | 10 | 34 |
|                                        | 13a | Early-Mid Holocene | granite     | 75 | 98 |
|                                        | 13b | Early-Mid Holocene | granite     | 75 | 98 |
|                                        | 13c | Early-Mid Holocene | granite     | 75 | 98 |
|                                        | 13d | Early-Mid Holocene | granite     | 75 | 98 |
|                                        | 13e | Early-Mid Holocene | granite     | 75 | 98 |
|                                        | 14a | Early-Mid Holocene | granite     | 28 | 44 |
|                                        | 14b | Early-Mid Holocene | granite     | 28 | 44 |
|                                        | 14c | Early-Mid Holocene | granite     | 28 | 44 |
|                                        | 15  | Early-Mid Holocene | granite     | 33 | 50 |
|                                        | 16a | Early-Mid Holocene | granite     | 47 | 59 |
|                                        | 16b | Early-Mid Holocene | granite     | 47 | 59 |
|                                        | 16c | Early-Mid Holocene | granite     | 47 | 59 |
|                                        | 16d | Early-Mid Holocene | granite     | 47 | 59 |
|                                        | 16e | Early-Mid Holocene | granite     | 47 | 59 |

|     |                    |             |    |     |
|-----|--------------------|-------------|----|-----|
| 17a | Early-Mid Holocene | metagranite | 53 | 110 |
| 17b | Early-Mid Holocene | metagranite | 53 | 110 |
| 17c | Early-Mid Holocene | metagranite | 53 | 110 |
| 18a | Early-Mid Holocene | metagranite | 28 | 51  |
| 18b | Early-Mid Holocene | metagranite | 28 | 51  |
| 18c | Early-Mid Holocene | metagranite | 28 | 51  |
| 18d | Early-Mid Holocene | metagranite | 28 | 51  |
| 18e | Early-Mid Holocene | metagranite | 28 | 51  |
| 19a | Early-Mid Holocene | granite     | 49 | 62  |
| 19b | Early-Mid Holocene | granite     | 53 | 62  |
| 20a | Early-Mid Holocene | metagranite | 24 | 34  |
| 20b | Early-Mid Holocene | metagranite | 24 | 34  |
| 21a | Early-Mid Holocene | metagranite | 52 | 60  |
| 21b | Early-Mid Holocene | metagranite | 52 | 60  |
| 21c | Early-Mid Holocene | metagranite | 52 | 60  |
| 21d | Early-Mid Holocene | metagranite | 52 | 60  |
| 21e | Early-Mid Holocene | metagranite | 52 | 60  |
| 21f | Early-Mid Holocene | metagranite | 52 | 60  |
| 22a | Early-Mid Holocene | granite     | 25 | 45  |
| 22b | Early-Mid Holocene | granite     | 25 | 45  |
| 22c | Early-Mid Holocene | granite     | 25 | 45  |
| 22d | Early-Mid Holocene | granite     | 25 | 45  |
| 23a | Early-Mid Holocene | granite     | 24 | 33  |
| 23b | Early-Mid Holocene | granite     | 24 | 33  |
| 24a | Early-Mid Holocene | granite     | 18 | 37  |
| 24b | Early-Mid Holocene | granite     | 18 | 37  |
| 24c | Early-Mid Holocene | granite     | 18 | 37  |
| 25a | Early-Mid Holocene | granite     | 30 | 46  |
| 25b | Early-Mid Holocene | granite     | 30 | 46  |
| 26a | Early-Mid Holocene | granite     | 34 | 51  |
| 26b | Early-Mid Holocene | granite     | 34 | 51  |
| 26c | Early-Mid Holocene | granite     | 34 | 51  |

for methodology and locations of field sites.

crack observed for the same clast.

| Max clast height<br>above surface (cm) | Avg. clast Depth<br>below surface (cm) | Crack<br>width <sup>2</sup> | Crack<br>Type <sup>3</sup> | Encircles<br>Stone <sup>4</sup> | Strike of clast<br>long axis (°) | Strike<br>Fabric (°) |
|----------------------------------------|----------------------------------------|-----------------------------|----------------------------|---------------------------------|----------------------------------|----------------------|
| 4                                      | 3                                      | m                           | O                          | ---                             | 225                              | ---                  |
| 3.5                                    | 3                                      | l                           | O                          | ---                             | 335                              | ---                  |
| 5.5                                    | 3                                      | l                           | O                          | ---                             | 300                              | ---                  |
| 7.5                                    | 6.5                                    | m                           | O                          | ---                             | 98                               | ---                  |
| 4                                      | 6                                      | m                           | M                          | ---                             | 300                              | ---                  |
| 5.5                                    | 6                                      | l                           | M                          | ---                             | 40                               | ---                  |
| 3.5                                    | 3                                      | m                           | M                          | ---                             | 90                               | ---                  |
| 11                                     | 5                                      | m                           | J                          | ---                             | 30                               | ---                  |
| 7.5                                    | 4.5                                    | m                           | M                          | ---                             | 75                               | ---                  |
| 2.5                                    | 4                                      | t                           | M                          | ---                             | 45                               | ---                  |
| 2                                      | 2.5                                    | m                           | O                          | ---                             | 345                              | ---                  |
| 11                                     | 4.5                                    | m                           | O                          | ---                             | 36                               | ---                  |
| 1                                      | 3                                      | t                           | M                          | ---                             | 10                               | ---                  |
| 2                                      | 2                                      | t                           | O                          | ---                             | 5                                | ---                  |
| 3.5                                    | 3                                      | m                           | M                          | ---                             | 300                              | ---                  |
| 3                                      | 3.5                                    | m                           | B                          | ---                             | 237                              | ---                  |
| 2                                      | 3                                      | l                           | M                          | ---                             | 265                              | ---                  |
| 4                                      | 2                                      | t                           | M                          | ---                             | 232                              | ---                  |
| 3.5                                    | 2.5                                    | t                           | O                          | ---                             | 10                               | ---                  |
| 3.5                                    | 1.5                                    | t                           | O                          | ---                             | 355                              | ---                  |
| 5                                      | 4                                      | m                           | M                          | ---                             | 105                              | ---                  |
| 10                                     | 3                                      | m                           | M                          | ---                             | 70                               | ---                  |
| 6                                      | 3                                      | m                           | B                          | ---                             | 170                              | ---                  |
| 15                                     | 3.5                                    | l                           | M                          | ---                             | 82                               | ---                  |
| 24                                     | 10                                     | l                           | M                          | ---                             | 25                               | ---                  |
| 5                                      | 9                                      | m                           | O                          | ---                             | ---                              | ---                  |
| 5                                      | 9                                      | m                           | O                          | ---                             | ---                              | ---                  |
| 8                                      | 3                                      | m                           | O                          | ---                             | 350                              | ---                  |
| 36                                     | 5                                      | t                           | M                          | ---                             | 295                              | ---                  |
| 36                                     | 5                                      | t                           | J                          | ---                             | 295                              | ---                  |
| 34                                     | 5                                      | m                           | F                          | ---                             | 20                               | 100                  |
| 34                                     | 5                                      | m                           | B                          | ---                             | 100                              | 100                  |
| 15                                     | 5                                      | l                           | B                          | ---                             | 25                               | ---                  |
| 15                                     | 5                                      | t                           | M                          | ---                             | 25                               | ---                  |
| 10                                     | 5                                      | m                           | O                          | ---                             | 0                                | ---                  |
| 10                                     | 5                                      | t                           | M                          | ---                             | 0                                | ---                  |
| 13                                     | 5                                      | m                           | M                          | ---                             | 90                               | ---                  |
| 20                                     | 5                                      | m                           | M                          | ---                             | 45                               | ---                  |
| 20                                     | 5                                      | m                           | O                          | ---                             | 45                               | ---                  |

## Data Repository item 2005026

|      |     |   |     |     |     |     |
|------|-----|---|-----|-----|-----|-----|
| 15   | 5   | m | bj  | --- | 330 | --- |
| 15   | 5   | t | O   | --- | 330 | --- |
| 21   | --- | m | O   | --- | 20  | --- |
| 21   | --- | m | M   | --- | 20  | --- |
| 16   | --- | m | M   | --- | 55  | --- |
| 4    | 4.5 | m | F   | --- | 355 | --- |
| 4    | 4.5 | m | F   | --- | 355 | --- |
| 4.5  | --- | m | B   | --- | 80  | --- |
| 4.5  | --- | m | O   | --- | 80  | --- |
| 38   | --- | m | M   | --- | 340 | --- |
| 38   | --- | m | M   | --- | 340 | --- |
| 38   | --- | m | O   | --- | 340 | --- |
| 13   | 5   | t | O   | --- | 15  | --- |
| 11   | 3.5 | m | O   | --- | 340 | --- |
| 11   | 3.5 | m | M   | --- | 340 | --- |
| 4    | --- | m | B   | --- | 25  | --- |
| 4    | --- | m | B   | --- | 25  | --- |
| 17   | 5   | m | O   | --- | 350 | --- |
| 17   | 5   | t | O   | --- | 350 | --- |
| 17   | 5   | t | M   | --- | 350 | --- |
| 17   | 5   | t | B   | --- | 60  | --- |
| 17   | 5   | t | M   | --- | 60  | --- |
| 17   | 5   | t | J   | --- | 60  | --- |
| 17   | 5   | t | J   | --- | 60  | --- |
| 17.5 | --- | t | b,f | --- | 25  | --- |
| 17.5 | --- | t | F   | --- | 25  | --- |
| 17.5 | --- | t | F   | --- | 25  | --- |
| 12   | 5   | m | M   | --- | 345 | --- |
| 12   | 5   | t | M   | --- | 345 | --- |
| 9    | 5   | m | B   | --- | 80  | --- |
| 9    | 5   | m | B   | --- | 80  | --- |
| 3    | 3.5 | m | O   | --- | 10  | --- |
| 3    | 8   | t | M   | --- | 300 | --- |
| 9    | 5   | t | M   | --- | 350 | --- |
| 2.5  | 5   | m | M   | --- | 345 | --- |
| 2    | 8   | l | O   | --- | 355 | --- |
| 1    | 4.5 | m | O   | --- | 305 | --- |
| 22   | 4   | t | M   | --- | 340 | --- |
| 7    | 5   | m | O   | --- | 305 | --- |
| 7    | 5   | t | B   | --- | 305 | --- |
| 3    | 5   | t | O   | --- | 310 | --- |
| 3    | 5   | m | B   | --- | 310 | --- |
| 3    | 5   | m | M   | --- | 355 | --- |
| 7    | 4   | m | M   | --- | 335 | --- |
| 20   | 5   | m | O   | --- | 30  | --- |
| 20   | 5   | t | J   | --- | 30  | --- |
| 9    | 5   | t | O   | --- | 195 | --- |
| 9    | 5   | t | B   | --- | 195 | --- |
| 22   | 5   | t | M   | --- | 336 | --- |
| 22   | 5   | t | O   | --- | 336 | --- |
| 13   | --- | l | O   | --- | 330 | --- |
| 14   | 5   | m | B   | --- | 60  | --- |

## Data Repository item 2005026

|     |     |   |    |     |     |     |
|-----|-----|---|----|-----|-----|-----|
| 24  | 5   | l | M  | --- | 10  | --- |
| 42  | 5   | t | M  | --- | 350 | --- |
| 20  | 5   | l | O  | --- | 310 | --- |
| 20  | 5   | t | O  | --- | 310 | --- |
| 9   | 9   | t | M  | --- | 295 | --- |
| 6   | 5   | t | O  | --- | 15  | --- |
| 6   | 5   | t | M  | --- | 15  | --- |
| 2   | 1   | m | M  | --- | 110 | --- |
| 3   | 1   | m | M  | --- | 350 | --- |
| 4   | 1.5 | l | M  | --- | 5   | --- |
| 7   | 3   | l | O  | --- | 30  | --- |
| 10  | 3   | m | M  | --- | 260 | --- |
| 5   | 4   | l | M  | --- | 275 | --- |
| 1.5 | 2   | m | M  | --- | 28  | --- |
| 6   | 1.5 | m | M  | --- | 330 | --- |
| 6   | 1.5 | m | O  | --- | 330 | --- |
| 5   | 2.5 | m | M  | --- | 70  | --- |
| 8   | 5   | l | O  | --- | 55  | --- |
| 3.5 | 5   | m | M  | --- | 28  | --- |
| 4.5 | 9   | m | M  | --- | 15  | --- |
| 4.5 | 5   | l | M  | --- | 250 | --- |
| 13  | 2.5 | m | O  | --- | 3   | --- |
| 5.5 | 4   | m | B  | --- | 60  | --- |
| 7   | 3.5 | m | O  | --- | 70  | --- |
| 5   | 2.5 | t | O  | --- | 60  | --- |
| 2.5 | 4.5 | t | O  | --- | 330 | --- |
| 3   | 4   | t | M  | --- | 70  | --- |
| 5.5 | 1.5 | t | O  | --- | 320 | --- |
| 9   | 4   | t | O  | --- | 335 | --- |
| 4   | 1.5 | m | M  | --- | 2   | --- |
| 2.5 | 3   | t | M  | --- | 250 | --- |
| 3.5 | 2   | m | B  | --- | 45  | --- |
| 4   | 1   | t | M  | 1   | 95  | --- |
| 10  | 5   | t | BJ | 1   | 30  | --- |
| 10  | 5   | t | J  | 1   | 30  | --- |
| 2   | 2   | t | O  | 3   | 30  | --- |
| 2   | 3   | i | BJ | 3   | 75  | --- |
| 30  | 10  | t | M  | 2   | 15  | --- |
| 30  | 10  | t | O  | 2   | 15  | --- |
| 10  | 5   | t | M  | 4   | 70  | --- |
| 10  | 5   | t | B  | 4   | 70  | --- |
| 3   | 0.5 | m | BJ | 4   | 35  | --- |
| 15  | 10  | m | J  | 1   | 345 | 45  |
| 15  | 10  | t | M  | 1   | 345 | --- |
| 6   | 10  | i | BO | 1   | 40  | --- |
| 2   | 3   | i | BJ | 1   | 90  | --- |
| 9   | 7   | t | M  | 3   | --- | --- |
| 9   | 7   | t | O  | 3   | --- | --- |
| 5   | 1   | i | O  | 3   | 290 | --- |
| 16  | --- | i | B  | 1   | 0   | --- |
| 16  | --- | m | F  | --- | 0   | --- |
| 16  | 10  | i | B  | 1   | 30  | --- |



## Data Repository item 2005026

|    |     |     |    |     |     |     |
|----|-----|-----|----|-----|-----|-----|
| 1  | 3   | i   | M  | 1   | 55  | --- |
| 15 | 10  | l   | F  | 2   | 20  | 260 |
| 15 | 10  | t   | B  | 2   | 20  | --- |
| 7  | 5   | t   | Fm | --- | 20  | 20  |
| 6  | 6   | t   | M  | 2   | 90  | --- |
| 6  | 6   | t   | O  | 1   | 90  | --- |
| 6  | 6   | i   | M  | 3   | 90  | --- |
| 5  | 5   | i   | B  | 1   | 320 | --- |
| 5  | 5   | i   | O  | 3   | 320 | --- |
| 5  | 5   | i   | M  | 1   | 320 | --- |
| 4  | 7   | t   | O  | 3   | --- | --- |
| 4  | 7   | t   | O  | 3   | --- | --- |
| 4  | 5   | i   | Jm | 3   | 40  | 40  |
| 9  | 5   | t   | M  | 3   | 350 | --- |
| 24 | 10  | t   | M  | 3   | 5   | --- |
| 24 | 10  | t   | O  | 1   | 5   | --- |
| 4  | 5   | t   | Bm | 2   | 355 | 90  |
| 4  | 5   | t   | F  | 2   | 355 | 90  |
| 7  | 4   | i   | B  | 1   | 3   | --- |
| 9  | --- | i   | BJ | 1   | 2   | 4   |
| 6  | --- | m   | M  | 2   | 5   | --- |
| 6  | --- | i   | O  | 1   | 5   | --- |
| 6  | --- | t   | J  | 0   | 5   | --- |
| 10 | 14  | t   | F  | 3   | 355 | 315 |
| 5  | 3   | t   | B  | 3   | 350 | --- |
| 3  | 5   | --- | M  | 0   | 110 | --- |
| 3  | --- | i   | F  | 3   | 110 | --- |
| 3  | --- | i   | B  | 1   | 86  | --- |
| 3  | 1   | t   | M  | 1   | 86  | --- |
| 6  | 6   | i   | O  | 1   | 30  | --- |
| 6  | 7   | m   | M  | 4   | 30  | --- |
| 6  | 7   | m   | O  | 4   | 30  | --- |
| 6  | 6   | i   | M  | 1   | 18  | --- |
| 14 | 3   | m   | B  | 4   | 30  | --- |
| 14 | 3   | m   | J  | 2   | 30  | --- |
| 17 | 5   | l   | bm | 0   | 337 | --- |
| 12 | 5   | l   | M  | 3   | 88  | --- |
| 14 | 5   | t   | F  | 2   | --- | --- |
| 14 | 5   | --- | M  | 2   | --- | --- |
| 12 | 5   | l   | M  | 2   | 9   | --- |
| 12 | 5   | m   | O  | 2   | 9   | --- |
| 12 | 5   | l   | M  | 0   | 29  | --- |
| 12 | 5   | l   | F  | 0   | 29  | --- |
| 12 | 5   | t   | M  | 1   | --- | --- |
| 50 | 5   | t   | B  | 1   | 60  | --- |
| 50 | 5   | l   | J  | 2   | 60  | --- |
| 61 | 5   | t   | B  | 1   | 52  | --- |
| 61 | 5   | t   | F  | 1   | 52  | --- |
| 61 | 5   | t   | M  | 1   | 52  | --- |
| 89 | 5   | m   | B  | 1   | 14  | --- |
| 89 | 5   | t   | J  | 2   | 14  | --- |
| 55 | 5   | t   | M  | 2   | 83  | 92  |

|    |   |     |     |     |     |     |
|----|---|-----|-----|-----|-----|-----|
| 55 | 5 | t   | F   | 1   | 83  | --- |
| 43 | 5 | t   | BF  | --- | 79  | 79  |
| 43 | 5 | i   | M   | --- | 79  | --- |
| 51 | 5 | i   | M   | 1   | 308 | 308 |
| 64 | 5 | t   | M   | 2   | --- | --- |
| 64 | 5 | t   | O   | 1   | --- | --- |
| 64 | 5 | t   | O   | 1   | --- | --- |
| 47 | 5 | --- | M   | 2   | 84  | --- |
| 47 | 5 | t   | BJ  | 2   | 84  | --- |
| 32 | 5 | m   | M   | 2   | 109 | 109 |
| 32 | 5 | t   | BF  | 1   | 109 | --- |
| 18 | 5 | l   | M   | 2   | --- | --- |
| 18 | 5 | i   | J   | 1   | --- | --- |
| 18 | 5 | i   | J   | 1   | --- | --- |
| 6  | 5 | t   | O   | 0   | --- | 4   |
| 6  | 5 | i   | F   | 1   | --- | --- |
| 37 | 5 | t   | M   | --- | 72  | 130 |
| 35 | 5 | --- | --- | --- | 58  | --- |
| 35 | 5 | l   | M   | 0   | 114 | --- |
| 27 | 5 | i   | M   | 1   | 344 | --- |
| 27 | 5 | l   | O   | 1   | 344 | --- |
| 43 | 5 | l   | O   | 0   | 0   | 62  |
| 43 | 5 | i   | Bm  | 1   | 0   | --- |
| 43 | 5 | l   | J   | 0   | 0   | --- |
| 53 | 5 | i   | M   | 2   | 47  | --- |
| 53 | 5 | t   | J   | 2   | 47  | --- |
| 8  | 5 | t   | M   | 3   | 16  | --- |
| 6  | 5 | t   | M   | 2   | --- | --- |
| 6  | 5 | t   | M   | 1   | --- | --- |
| 8  | 5 | i   | M   | 2   | --- | --- |
| 2  | 5 | t   | B   | 1   | 295 | --- |
| 2  | 5 | i   | O   | 1   | 295 | --- |
| 5  | 5 | l   | M   | 0   | 280 | --- |
| 8  | 5 | i   | BJ  | 3   | 284 | --- |
| 8  | 5 | i   | M   | 1   | 284 | --- |
| 5  | 5 | --- | F   | 0   | --- | 293 |
| 5  | 5 | i   | M   | --- | --- | --- |
| 12 | 5 | m   | M   | 3   | 310 | --- |
| 12 | 5 | m   | M   | 1   | 310 | --- |
| 18 | 5 | m   | O   | 3   | 308 | --- |
| 18 | 5 | i   | O   | 2   | 308 | --- |
| 18 | 5 | i   | M   | 1   | 308 | --- |
| 27 | 5 | m   | M   | 4   | 301 | --- |
| 27 | 5 | t   | BJ  | 2   | 301 | --- |
| 3  | 5 | t   | O   | 3   | 7   | --- |
| 22 | 5 | t   | M   | 3   | --- | --- |
| 22 | 5 | i   | O   | 2   | --- | --- |
| 22 | 5 | t   | J   | 1   | --- | --- |
| 10 | 5 | l   | O   | 0   | --- | --- |
| 10 | 5 | t   | M   | 3   | --- | --- |
| 21 | 5 | t   | B   | 2   | 300 | --- |
| 21 | 5 | t   | M   | 1   | 300 | --- |

|    |     |     |    |     |     |     |
|----|-----|-----|----|-----|-----|-----|
| 8  | 5   | t   | M  | 3   | --- | --- |
| 8  | 5   | i   | J  | 2   | --- | --- |
| 6  | 5   | i   | M  | 2   | 355 | --- |
| 6  | 5   | i   | BF | 2   | 355 | --- |
| 5  | 5   | t   | O  | 2   | 357 | --- |
| 5  | 5   | --- | Bm | --- | 357 | --- |
| 12 | 5   | m   | O  | 4   | --- | --- |
| 12 | 5   | t   | O  | 1   | --- | --- |
| 14 | 5   | t   | BF | 2   | 35  | --- |
| 14 | 5   | t   | M  | 1   | 35  | --- |
| 14 | 5   | i   | O  | 1   | 35  | --- |
| 17 | 5   | t   | B  | 2   | 50  | --- |
| 17 | 5   | t   | M  | 1   | 50  | --- |
| 9  | 5   | i   | B  | 2   | 254 | --- |
| 9  | 5   | t   | O  | 2   | 254 | --- |
| 13 | 5   | i   | M  | 1   | 22  | --- |
| 9  | --- | t   | M  | 2   | --- | --- |
| 15 | --- | t   | J  | 1   | 50  | --- |
| 16 | --- | t   | O  | 2   | --- | --- |
| 19 | --- | t   | O  | 2   | --- | --- |
| 19 | --- | m   | J  | 2   | --- | --- |
| 27 | --- | t   | O  | 2   | --- | --- |
| 27 | --- | --- | O  | --- | --- | --- |
| 39 | --- | t   | B  | 2   | 35  | --- |
| 39 | --- | m   | O  | 3   | 35  | --- |
| 18 | --- | t   | M  | 3   | --- | --- |
| 18 | --- | t   | O  | 1   | --- | --- |
| 20 | --- | t   | JO | --- | --- | --- |
| 20 | --- | t   | M  | 3   | --- | --- |
| 22 | --- | m   | M  | 3   | --- | --- |
| 22 | --- | m   | M  | 2   | --- | --- |
| 22 | --- | --- | O  | 2   | --- | --- |
| 23 | --- | m   | O  | 2   | --- | --- |
| 23 | --- | t   | J  | 2   | --- | --- |
| 23 | --- | m   | M  | 3   | --- | --- |
| 20 | --- | t   | O  | 2   | --- | --- |
| 20 | --- | --- | O  | --- | --- | --- |
| 20 | --- | --- | M  | --- | --- | --- |
| 37 | --- | t   | J  | 2   | --- | --- |
| 37 | --- | t   | M  | 2   | --- | --- |
| 37 | --- | t   | O  | 1   | --- | --- |
| 30 | --- | t   | M  | 1   | --- | --- |
| 30 | --- | t   | O  | 1   | --- | --- |
| 42 | --- | t   | B  | 2   | 340 | --- |
| 42 | --- | i   | J  | 2   | 340 | --- |
| 59 | --- | i   | M  | 1   | --- | --- |
| 59 | --- | t   | J  | 1   | --- | --- |
| 59 | --- | i   | M  | --- | --- | --- |
| 35 | --- | t   | F  | 2   | --- | --- |
| 35 | --- | i   | O  | 1   | --- | --- |
| 35 | --- | --- | M  | --- | --- | --- |
| 22 | --- | l   | M  | 3   | --- | --- |

|    |     |     |    |     |     |     |
|----|-----|-----|----|-----|-----|-----|
| 22 | --- | --- | F  | --- | --- | 30  |
| 24 | --- | t   | Jm | 2   | 330 | --- |
| 29 | --- | t   | M  | 2   | --- | --- |
| 16 | --- | i   | Bm | 2   | 349 | --- |
| 16 | --- | i   | B  | 2   | 349 | --- |
| 10 | --- | t   | M  | 2   | --- | --- |
| 27 | --- | m   | M  | 3   | --- | --- |
| 27 | --- | t   | O  | 3   | --- | --- |
| 63 | --- | --- | O  | --- | --- | --- |
| 23 | --- | t   | M  | 1   | --- | --- |
| 23 | --- | t   | J  | 1   | --- | --- |
| 23 | --- | t   | M  | 2   | --- | --- |
| 17 | --- | l   | O  | 0   | 48  | --- |
| 25 | --- | m   | O  | 2   | --- | --- |
| 25 | --- | t   | M  | 2   | --- | --- |
| 32 | --- | i   | O  | 1   | --- | --- |
| 30 | --- | t   | M  | 2   | --- | --- |
| 10 | --- | m   | F  | 2   | --- | 80  |
| 10 | --- | t   | M  | 2   | --- | --- |
| 10 | --- | t   | M  | 2   | --- | --- |
| 28 | --- | i   | M  | 1   | --- | --- |
| 29 | --- | t   | O  | 0   | --- | --- |
| 29 | --- | m   | M  | 2   | --- | --- |
| 12 | --- | t   | M  | 2   | --- | --- |
| 12 | --- | t   | M  | 2   | --- | --- |
| 25 | --- | t   | O  | 2   | --- | --- |
| 25 | --- | t   | O  | 3   | --- | --- |
| 11 | --- | t   | M  | 2   | --- | --- |
| 11 | --- | t   | O  | 3   | --- | --- |
| 11 | --- | i   | O  | 1   | --- | --- |
| 32 | --- | i   | M  | 1   | --- | --- |
| 54 | --- | t   | M  | 2   | --- | --- |
| 54 | --- | --- | BJ | --- | 100 | --- |
| 23 | --- | t   | O  | 2   | --- | --- |
| 23 | --- | i   | O  | 1   | --- | --- |
| 26 | --- | t   | M  | 1   | --- | --- |
| 26 | --- | t   | J  | 2   | --- | --- |
| 27 | --- | i   | M  | 2   | --- | --- |
| 27 | --- | i   | M  | 2   | --- | --- |
| 35 | --- | t   | M  | 2   | --- | --- |
| 35 | --- | t   | O  | 2   | --- | --- |
| 35 | --- | i   | O  | 2   | --- | --- |
| 36 | --- | t   | M  | 1   | --- | --- |
| 36 | --- | t   | O  | 1   | --- | --- |
| 51 | --- | m   | F  | 2   | --- | 45  |
| 51 | --- | i   | J  | 2   | --- | --- |
| 51 | --- | t   | J  | 3   | --- | --- |
| 28 | --- | i   | O  | 1   | --- | --- |
| 28 | --- | t   | O  | 2   | --- | --- |
| 28 | --- | t   | M  | --- | --- | --- |
| 15 | --- | l   | B  | 0   | 69  | --- |
| 15 | --- | i   | M  | 1   | --- | --- |

|    |     |     |    |     |     |     |
|----|-----|-----|----|-----|-----|-----|
| 18 | --- | t   | M  | 1   | --- | --- |
| 18 | --- | t   | J  | 1   | --- | --- |
| 50 | --- | t   | O  | 1   | --- | --- |
| 50 | --- | t   | M  | 1   | --- | --- |
| 50 | --- | m   | J  | 3   | --- | --- |
| 26 | --- | t   | M  | 2   | --- | --- |
| 14 | --- | m   | M  | 3   | --- | --- |
| 14 | --- | t   | M  | --- | --- | --- |
| 23 | --- | i   | O  | 2   | --- | --- |
| 23 | --- | i   | M  | --- | --- | --- |
| 38 | --- | t   | M  | 1   | --- | --- |
| 38 | --- | t   | O  | 1   | --- | --- |
| 38 | --- | m   | JF | 2   | --- | --- |
| 9  | --- | m   | O  | 0   | --- | --- |
| 9  | --- | m   | O  | 0   | --- | --- |
| 30 | --- | l   | O  | 0   | --- | --- |
| 30 | --- | t   | O  | 3   | --- | --- |
| 30 | --- | t   | O  | --- | --- | --- |
| 31 | --- | l   | M  | 0   | --- | --- |
| 31 | --- | m   | M  | 3   | --- | --- |
| 58 | --- | t   | M  | 1   | --- | 60  |
| 58 | --- | t   | O  | 2   | --- | --- |
| 58 | --- | t   | O  | 1   | --- | --- |
| 40 | --- | t   | O  | 3   | --- | --- |
| 40 | --- | i   | M  | 3   | --- | --- |
| 20 | --- | m   | M  | 4   | --- | --- |
| 20 | --- | i   | O  | 3   | --- | --- |
| 68 | --- | t   | O  | 2   | --- | --- |
| 68 | --- | t   | M  | 4   | --- | --- |
| 68 | --- | t   | J  | --- | --- | --- |
| 54 | --- | t   | O  | 4   | --- | --- |
| 54 | --- | i   | M  | 2   | --- | --- |
| 60 | --- | l   | M  | 0   | --- | --- |
| 70 | --- | t   | BJ | 1   | 65  | --- |
| 70 | --- | t   | M  | 2   | --- | --- |
| 78 | --- | t   | BO | 2   | 101 | --- |
| 78 | --- | i   | M  | 1   | --- | --- |
| 50 | --- | t   | O  | 4   | --- | --- |
| 50 | --- | i   | M  | 1   | --- | --- |
| 52 | --- | m   | O  | 3   | --- | --- |
| 52 | --- | m   | O  | 3   | --- | --- |
| 52 | --- | i   | M  | 1   | --- | --- |
| 66 | --- | i   | M  | 2   | --- | --- |
| 66 | --- | i   | B  | 1   | --- | --- |
| 90 | --- | i   | M  | 1   | --- | --- |
| 90 | --- | --- | F  | --- | --- | --- |
| 90 | --- | --- | F  | --- | --- | --- |
| 90 | --- | --- | F  | --- | --- | --- |
| 53 | --- | t   | M  | 3   | --- | --- |
| 53 | --- | t   | O  | 2   | --- | --- |
| 60 | --- | t   | M  | 2   | --- | --- |
| 60 | --- | t   | O  | 3   | --- | --- |

## Data Repository item 2005026

|    |     |     |    |     |     |     |
|----|-----|-----|----|-----|-----|-----|
| 60 | --- | t   | O  | 3   | --- | --- |
| 11 | 5   | t   | B  | 2   | 40  | --- |
| 11 | --- | --- | F  | --- | 40  | 90  |
| 12 | 5   | i   | M  | 1   | --- | --- |
| 7  | 5   | i   | JF | 1   | 90  | --- |
| 7  | 5   | i   | B  | 1   | 90  | --- |
| 7  | 5   | i   | M  | 1   | 90  | --- |
| 16 | --- | t   | JF | 2   | 285 | --- |
| 16 | --- | --- | JF | --- | 285 | --- |
| 16 | --- | i   | M  | 1   | 285 | --- |
| 16 | --- | t   | M  | 2   | 285 | --- |
| 16 | --- | i   | M  | 1   | 285 | --- |
| 22 | --- | t   | M  | 2   | 0   | --- |
| 22 | --- | t   | B  | 2   | 0   | --- |
| 22 | --- | i   | O  | 1   | 0   | --- |
| 22 | --- | i   | M  | 1   | 0   | --- |
| 12 | --- | t   | M  | 3   | --- | --- |
| 12 | --- | t   | M  | 2   | --- | --- |
| 12 | --- | t   | M  | 1   | --- | --- |
| 12 | --- | t   | O  | 2   | --- | --- |
| 13 | --- | i   | M  | 1   | 315 | --- |
| 13 | --- | i   | O  | 1   | 315 | --- |
| 13 | --- | t   | O  | 2   | 315 | --- |
| 13 | --- | i   | JF | 1   | 315 | --- |
| 13 | 5   | i   | M  | 1   | --- | --- |
| 13 | 5   | i   | O  | 1   | --- | --- |
| 13 | 5   | i   | M  | 1   | --- | --- |
| 13 | 5   | i   | M  | 1   | --- | --- |
| 13 | 5   | i   | O  | 1   | --- | --- |
| 14 | --- | i   | M  | 1   | --- | --- |
| 14 | --- | t   | J  | 1   | --- | --- |
| 14 | --- | i   | M  | 1   | --- | --- |
| 13 | 10  | i   | FO | 2   | --- | 34  |
| 13 | 10  | i   | M  | 1   | --- | --- |
| 13 | 10  | i   | J  | 1   | --- | --- |
| 20 | 10  | t   | O  | 2   | --- | --- |
| 20 | 10  | t   | M  | 1   | --- | --- |
| 20 | 10  | i   | J  | 1   | --- | --- |
| 20 | 10  | t   | O  | 1   | --- | --- |
| 12 | --- | t   | M  | 2   | --- | --- |
| 12 | --- | m   | F  | 4   | --- | 310 |
| 9  | --- | i   | O  | 1   | 56  | --- |
| 9  | --- | i   | B  | 1   | 56  | --- |
| 26 | 10  | m   | O  | 2   | --- | --- |
| 26 | 10  | i   | M  | 1   | --- | --- |
| 26 | 10  | i   | M  | 1   | --- | --- |
| 5  | 5   | i   | F  | 1   | --- | 35  |
| 5  | 5   | i   | O  | 1   | --- | --- |
| 11 | 5   | i   | O  | 1   | --- | --- |
| 11 | 5   | i   | J  | 1   | --- | --- |
| 13 | 10  | i   | O  | 1   | --- | --- |
| 13 | 10  | i   | M  | 1   | --- | --- |

## Data Repository item 2005026

|    |     |     |    |   |     |     |
|----|-----|-----|----|---|-----|-----|
| 10 | 10  | i   | M  | 1 | --- | --- |
| 10 | 10  | i   | O  | 2 | --- | --- |
| 10 | 10  | t   | O  | 1 | --- | --- |
| 10 | 10  | i   | M  | 1 | --- | --- |
| 10 | 5   | i   | M  | 2 | --- | --- |
| 10 | 5   | i   | O  | 1 | --- | --- |
| 10 | 5   | i   | J  | 1 | --- | --- |
| 13 | 10  | i   | M  | 1 | --- | --- |
| 13 | 10  | i   | J  | 1 | --- | --- |
| 13 | 10  | i   | O  | 1 | --- | --- |
| 16 | --- | t   | M  | 2 | --- | 71  |
| 16 | --- | t   | J  | 2 | --- | --- |
| 16 | --- | i   | J  | 1 | --- | --- |
| 15 | --- | i   | M  | 1 | 50  | --- |
| 15 | --- | m   | M  | 2 | 50  | --- |
| 15 | --- | m   | JF | 1 | 50  | --- |
| 15 | --- | i   | JF | 1 | 50  | --- |
| 15 | 5   | i   | O  | 1 | 80  | --- |
| 15 | 5   | i   | B  | 1 | 80  | --- |
| 11 | 5   | i   | O  | 1 | 60  | --- |
| 11 | 5   | i   | B  | 1 | 60  | --- |
| 11 | 5   | i   | J  | 1 | 60  | --- |
| 10 | 10  | t   | M  | 1 | 78  | --- |
| 10 | 10  | t   | B  | 1 | 78  | --- |
| 10 | 10  | i   | M  | 2 | 78  | --- |
| 11 | 5   | i   | M  | 2 | --- | --- |
| 11 | 5   | i   | J  | 1 | --- | --- |
| 12 | 5   | i   | O  | 2 | --- | --- |
| 12 | 5   | i   | M  | 2 | --- | --- |
| 12 | 5   | i   | J  | 2 | --- | --- |
| 25 | 10  | m   | F  | 2 | --- | 290 |
| 25 | 10  | m   | O  | 2 | --- | --- |
| 25 | 10  | m   | J  | 4 | --- | --- |
| 9  | 5   | i   | B  | 2 | 36  | --- |
| 9  | 5   | i   | M  | 1 | 36  | --- |
| 9  | 5   | t   | J  | 2 | 36  | --- |
| 9  | 5   | i   | M  | 1 | 36  | --- |
| 9  | 5   | i   | O  | 2 | 36  | --- |
| 11 | 5   | i   | Fm | 1 | --- | 330 |
| 11 | 5   | i   | J  | 1 | --- | --- |
| 11 | 5   | i   | F  | 1 | --- | 296 |
| 11 | 5   | i   | M  | 1 | --- | --- |
| 11 | 5   | i   | O  | 2 | --- | --- |
| 20 | 5   | i   | M  | 1 | --- | --- |
| 20 | 5   | i   | O  | 1 | --- | --- |
| 20 | 5   | i   | M  | 1 | --- | --- |
| 18 | 5   | t   | F  | 2 | --- | 55  |
| 18 | 5   | t   | J  | 2 | --- | --- |
| 18 | 5   | i   | M  | 2 | --- | --- |
| 5  | 5   | t   | J  | 2 | --- | --- |
| 5  | 5   | i   | M  | 1 | --- | --- |
| 5  | 5   | --- | M  | 1 | --- | --- |

## Data Repository item 2005026

|    |     |     |    |   |     |     |
|----|-----|-----|----|---|-----|-----|
| 25 | 10  | t   | B  | 1 | 2   | 100 |
| 25 | 10  | t   | J  | 1 | --- | --- |
| 25 | 10  | i   | J  | 1 | --- | --- |
| 15 | --- | i   | F  | 1 | --- | 105 |
| 15 | --- | i   | M  | 1 | --- | --- |
| 15 | --- | i   | O  | 1 | --- | --- |
| 18 | 10  | t   | B  | 1 | 16  | 110 |
| 18 | 10  | t   | M  | 1 | --- | --- |
| 18 | 10  | t   | O  | 1 | --- | --- |
| 18 | 10  | t   | J  | 1 | --- | --- |
| 11 | 5   | i   | M  | 2 | --- | --- |
| 11 | 5   | i   | O  | 1 | --- | --- |
| 11 | 5   | i   | M  | 1 | --- | --- |
| 30 | 10  | m   | M  | 2 | --- | 33  |
| 30 | 10  | m   | J  | 2 | --- | --- |
| 30 | 10  | t   | M  | 1 | --- | --- |
| 30 | 10  | t   | O  | 1 | --- | --- |
| 5  | 10  | t   | O  | 2 | --- | --- |
| 5  | 10  | i   | O  | 1 | --- | --- |
| 16 | 10  | i   | Fm | 2 | --- | 349 |
| 16 | 10  | i   | O  | 1 | --- | --- |
| 16 | 10  | i   | M  | 1 | --- | --- |
| 14 | 5   | i   | O  | 1 | --- | --- |
| 14 | 5   | i   | M  | 1 | --- | --- |
| 14 | 5   | i   | J  | 1 | --- | --- |
| 18 | 10  | i   | O  | 1 | --- | 24  |
| 18 | 10  | --- | O  | 0 | --- | --- |
| 18 | 10  | t   | J  | 1 | --- | --- |
| 12 | 5   | t   | O  | 1 | --- | --- |
| 12 | 5   | t   | M  | 1 | --- | --- |
| 15 | 10  | t   | O  | 2 | --- | --- |
| 15 | 10  | i   | M  | 1 | --- | --- |
| 13 | 10  | i   | B  | 2 | 10  | --- |
| 13 | 10  | i   | O  | 1 | --- | --- |
| 18 | 10  | i   | M  | 1 | --- | --- |
| 18 | 10  | i   | O  | 1 | --- | --- |
| 18 | 10  | i   | M  | 1 | --- | --- |
| 18 | 10  | i   | B  | 1 | 40  | --- |
| 18 | 10  | i   | M  | 1 | --- | --- |
| 18 | 10  | i   | J  | 1 | --- | --- |
| 14 | 10  | t   | M  | 1 | --- | --- |
| 14 | 10  | i   | M  | 1 | --- | --- |
| 14 | 10  | i   | M  | 2 | --- | --- |
| 11 | 5   | i   | F  | 1 | --- | 35  |
| 11 | 5   | t   | M  | 1 | --- | --- |
| 11 | 5   | t   | JO | 1 | --- | --- |
| 17 | 10  | m   | F  | 1 | --- | 45  |
| 17 | 10  | m   | M  | 2 | --- | --- |
| 14 | 10  | t   | O  | 1 | --- | 350 |
| 14 | 10  | t   | O  | 1 | --- | --- |
| 14 | 10  | t   | M  | 2 | --- | --- |
| 11 | 5   | t   | M  | 2 | --- | --- |



|    |     |     |     |     |     |     |
|----|-----|-----|-----|-----|-----|-----|
| 11 | 5   | t   | J   | 2   | --- | --- |
| 11 | 5   | t   | F   | 2   | --- | --- |
| 15 | 10  | t   | O   | 1   | --- | 0   |
| 15 | 10  | m   | F   | 2   | --- | --- |
| 15 | 10  | t   | M   | 1   | --- | --- |
| 14 | 14  | i   | O   | 1   | --- | --- |
| 14 | 14  | t   | O   | 3   | --- | --- |
| 9  | 5   | i   | M   | 1   | --- | --- |
| 13 | 5   | i   | B   | 2   | --- | 110 |
| 13 | 5   | t   | M   | 3   | 77  | 110 |
| 15 | 5   | --- | --- | --- | --- | --- |
| 14 | 5   | i   | B   | 1   | 160 | --- |
| 14 | 5   | t   | B   | --- | --- | --- |
| 14 | 5   | t   | O   | 3   | --- | --- |
| 14 | 5   | t   | J   | 2   | --- | --- |
| 18 | 5   | t   | J   | 2   | 15  | --- |
| 18 | 5   | i   | J   | 2   | --- | --- |
| 18 | 5   | t   | J   | 2   | --- | --- |
| 18 | 5   | --- | M   | 1   | --- | --- |
| 12 | 12  | t   | J   | 3   | --- | --- |
| 12 | 12  | m   | J   | 3   | --- | --- |
| 12 | 12  | i   | O   | 1   | --- | --- |
| 20 | 12  | i   | O   | 1   | --- | --- |
| 20 | 12  | i   | O   | 1   | --- | --- |
| 20 | 12  | t   | J   | 2   | --- | --- |
| 20 | 12  | t   | J   | 2   | --- | --- |
| 12 | 17  | t   | O   | 1   | 358 | --- |
| 12 | 17  | t   | O   | 3   | --- | --- |
| 12 | 17  | i   | M   | 1   | --- | --- |
| 8  | --- | t   | O   | 3   | --- | --- |
| 8  | --- | t   | O   | 3   | --- | --- |
| 21 | 5   | t   | O   | 1   | --- | --- |
| 21 | 5   | i   | M   | 1   | --- | --- |
| 21 | 5   | i   | J   | 1   | --- | --- |
| 21 | 5   | t   | J   | 2   | --- | --- |
| 21 | 5   | t   | J   | 1   | --- | --- |
| 7  | 8   | i   | B   | 1   | 195 | 295 |
| 7  | 8   | i   | J   | 1   | 195 | 295 |
| 53 | 5   | t   | M   | 1   | --- | --- |
| 53 | 5   | t   | O   | 1   | --- | --- |
| 53 | 5   | t   | O   | 1   | --- | --- |
| 53 | 5   | t   | J   | 1   | --- | --- |
| 53 | 5   | t   | J   | 1   | --- | --- |
| 28 | --- | t   | B   | 1   | 326 | --- |
| 28 | --- | t   | O   | 3   | --- | --- |
| 28 | --- | i   | F   | 1   | --- | 58  |
| 50 | 5   | i   | B   | 1   | 325 | --- |
| 53 | 5   | t   | O   | 1   | --- | --- |
| 53 | 5   | t   | M   | 1   | --- | --- |
| 53 | 5   | t   | J   | 1   | --- | --- |
| 53 | 5   | t   | J   | 2   | --- | --- |
| 53 | 5   | t   | J   | 1   | --- | --- |

Data Repository item 2005026

|    |     |     |    |     |     |     |
|----|-----|-----|----|-----|-----|-----|
| 40 | 5   | t   | M  | 1   | 326 | 315 |
| 40 | 5   | t   | M  | 1   | --- | --- |
| 40 | 5   | --- | F  | 2   | --- | --- |
| 31 | --- | i   | B  | 1   | 20  | 70  |
| 31 | --- | i   | J  | 1   | --- | --- |
| 31 | --- | t   | J  | 1   | --- | --- |
| 31 | --- | i   | J  | 1   | --- | --- |
| 31 | --- | i   | JF | 1   | --- | --- |
| 22 | 5   | --- | M  | --- | --- | --- |
| 22 | 5   | --- | O  | --- | --- | --- |
| 15 | 5   | i   | O  | 1   | --- | 0   |
| 15 | 5   | i   | M  | 1   | --- | --- |
| 17 | 5   | i   | J  | 1   | --- | --- |
| 17 | 5   | t   | J  | 3   | --- | --- |
| 17 | 5   | t   | M  | 2   | --- | --- |
| 17 | 5   | t   | M  | 2   | --- | --- |
| 17 | 5   | i   | O  | 1   | --- | --- |
| 17 | 5   | i   | J  | 1   | --- | --- |
| 13 | 5   | i   | B  | 1   | 0   | --- |
| 13 | 5   | t   | M  | 1   | --- | --- |
| 13 | 5   | t   | M  | 2   | --- | --- |
| 13 | 5   | i   | J  | 1   | --- | --- |
| 13 | 5   | i   | O  | 1   | --- | --- |
| 13 | 5   | i   | O  | 1   | --- | --- |
| 12 | 5   | i   | B  | 1   | 268 | --- |
| 12 | 5   | i   | O  | 1   | --- | --- |
| 12 | 5   | i   | M  | 1   | --- | --- |
| 16 | 5   | m   | B  | 3   | 298 | --- |
| 16 | 5   | t   | O  | 2   | --- | --- |
| 15 | 5   | i   | B  | 1   | 82  | --- |
| 15 | 5   | i   | M  | 1   | --- | --- |
| 15 | 5   | t   | J  | 1   | --- | --- |

| Strike<br>Crack (°) | Dip<br>Fabric (°) | Dip<br>Crack <sup>5</sup> (°) | Spalling<br>adjacent stones<br>1=yes<br>0=no | Rock<br>Spalling<br>1=yes<br>0=no | CaCO <sub>3</sub><br>ring<br>1=yes<br>0=no | Varnish<br>% cover |
|---------------------|-------------------|-------------------------------|----------------------------------------------|-----------------------------------|--------------------------------------------|--------------------|
| 305                 | ---               |                               | 0                                            | 0                                 | 0                                          | 100                |
| 55                  | ---               |                               | 0                                            | 0                                 | 0                                          | 100                |
| 300                 | ---               |                               | 0                                            | 0                                 | 0                                          | 100                |
| 98                  | ---               |                               | 0                                            | 0                                 | 0                                          | 100                |
| 20                  | ---               |                               | 0                                            | 0                                 | 0                                          | 100                |
| 10                  | ---               |                               | 0                                            | 0                                 | 0                                          | 100                |
| 347                 | ---               |                               | 0                                            | 0                                 | 0                                          | 100                |
| 100                 | ---               |                               | 0                                            | 0                                 | 0                                          | 100                |
| 335                 | ---               |                               | 0                                            | 0                                 | 0                                          | 100                |
| 30                  | ---               |                               | 0                                            | 0                                 | 0                                          | 100                |
| 62                  | ---               |                               | 0                                            | 0                                 | 0                                          | 100                |
| 36                  | ---               |                               | 0                                            | 0                                 | 0                                          | 100                |
| 10                  | ---               |                               | 0                                            | 0                                 | 0                                          | 100                |
| 120                 | ---               |                               | 0                                            | 0                                 | 0                                          | 100                |
| 4                   | ---               |                               | ---                                          | 0                                 | 0                                          | 100                |
| 320                 | ---               |                               | 0                                            | 0                                 | 0                                          | 100                |
| 357                 | ---               |                               | 0                                            | 0                                 | 0                                          | 100                |
| 347                 | ---               |                               | 0                                            | 0                                 | 0                                          | 100                |
| 65                  | ---               |                               | 0                                            | 0                                 | 0                                          | 100                |
| 63                  | ---               |                               | 0                                            | 0                                 | 0                                          | 100                |
| 345                 | ---               |                               | 0                                            | ---                               | ---                                        | 100                |
| 340                 | ---               |                               | 0                                            | ---                               | ---                                        | 100                |
| 178                 | ---               |                               | 0                                            | ---                               | ---                                        | 100                |
| 356                 | ---               |                               | 0                                            | 0                                 | 0                                          | 10                 |
| 25                  | ---               |                               | 0                                            | 0                                 | 1                                          | 100                |
| 320                 | ---               |                               | ---                                          | ---                               | 0                                          | 100                |
| 35                  | ---               |                               | ---                                          | ---                               | 0                                          | 100                |
| 310                 | ---               |                               | ---                                          | ---                               | 1                                          | 100                |
| 15                  | ---               |                               | 1                                            | 0                                 | 0                                          | 10-15              |
| 295                 | ---               |                               | ---                                          | 0                                 | 0                                          | ---                |
| 20                  | ---               |                               | 1                                            | 0                                 | 0                                          | 5-75               |
| 100                 | ---               |                               | 1                                            | 0                                 | 0                                          | 5-75               |
| 55                  | ---               |                               | ---                                          | 1                                 | 0                                          | 10-90              |
| 340                 | ---               |                               | ---                                          | ---                               | 0                                          | ---                |
| 80                  | ---               |                               | 1                                            | 0                                 | 0                                          | 10-70              |
| 335                 | ---               |                               | 1                                            | 0                                 | 0                                          | 10-70              |
| 355                 | ---               |                               | 1                                            | 1                                 | 1                                          | 10-50              |
| 355                 | ---               |                               | 1                                            | 0                                 | 1                                          | 0                  |
| 70                  | ---               |                               | 1                                            | 0                                 | 1                                          | 0                  |

Data Repository item 2005026

|     |     |     |     |     |        |
|-----|-----|-----|-----|-----|--------|
| 335 | --- | --- | --- | 1   | 10-30  |
| 40  | --- | --- | --- | 1   | 10-30  |
| 305 | --- | --- | --- | 1   | ---    |
| 20  | --- | --- | --- | --- | ---    |
| 10  | --- | 1   | 1   | 1   | ---    |
| 2   | --- | 1   | 0   | 1   | 0      |
| 85  | --- | 1   | 0   | 1   | 0      |
| 75  | --- | 1   | 0   | 1   | 5-15   |
| 320 | --- | 1   | 0   | 1   | 5-15   |
| 5   | --- | 1   | 1   | --- | 5      |
| 345 | --- | 1   | 1   | --- | ---    |
| 70  | --- | 1   | 1   | --- | ---    |
| 50  | --- | 1   | 0   | --- | 5-40   |
| 66  | --- | 1   | 0   | 1   | 5-50   |
| 345 | --- | 1   | 0   | 1   | 5-50   |
| 45  | --- | --- | 1   | 1   | 10-95  |
| 10  | --- | --- | 1   | 1   | 10-95  |
| 65  | --- | 1   | 0   | --- | 5-95   |
| 260 | --- | 1   | 0   | --- | 5-95   |
| 25  | --- | 1   | 0   | --- | 5-95   |
| 90  | --- | --- | --- | --- | 50-100 |
| 345 | --- | --- | --- | --- | 50-100 |
| 60  | --- | --- | --- | --- | 50-100 |
| 320 | --- | --- | --- | --- | 50-100 |
| 10  | --- | 1   | 0   | --- | 10-50  |
| 125 | --- | 1   | 0   | --- | 10-50  |
| 330 | --- | 1   | 0   | --- | 10-50  |
| 25  | --- | --- | --- | --- | ---    |
| 330 | --- | --- | --- | --- | ---    |
| 65  | --- | 1   | 1   | 0   | 20     |
| 80  | --- | 1   | 1   | 0   | 20     |
| 80  | --- | 0   | 0   | --- | 0      |
| 352 | --- | 0   | 0   | --- | 0      |
| 25  | --- | 0   | 0   | --- | 0      |
| 340 | --- | 0   | 1   | --- | 0      |
| 85  | --- | --- | 1   | --- | 10     |
| 315 | --- | --- | 0   | --- | 0      |
| 340 | --- | --- | 1   | --- | 10     |
| 55  | --- | 0   | 0   | --- | 10-70  |
| 310 | --- | 0   | 0   | --- | ---    |
| 40  | --- | --- | 1   | --- | 20-50  |
| 305 | --- | --- | --- | --- | ---    |
| 355 | --- | 0   | 0   | --- | 20     |
| 335 | --- | --- | --- | --- | 10     |
| 35  | --- | --- | 1   | --- | 10-50  |
| 115 | --- | --- | 1   | --- | 10-50  |
| 295 | --- | --- | 1   | --- | 5      |
| 195 | --- | 1   | 1   | --- | 5      |
| 346 | --- | 1   | 1   | --- | 0-100  |
| 60  | --- | 1   | 1   | --- | ---    |
| 45  | --- | 1   | 1   | --- | 5      |
| 65  | --- | 1   | 1   | --- | 0-10   |

Data Repository item 2005026

|     |     |    |     |   |     |       |
|-----|-----|----|-----|---|-----|-------|
| 0   | --- |    | 1   | 1 | --- | 10-20 |
| 26  | --- |    | 1   | 1 | --- | 5-80  |
| 35  | --- |    | 1   | 1 | --- | 5-20  |
| 310 | --- |    | 1   | 1 | --- | 5-20  |
| 25  | --- |    | 1   | 0 | --- | 10    |
| 58  | --- |    | 1   | 1 | --- | 10    |
| 30  | --- |    | 1   | 1 | --- | 10    |
| 15  | --- |    | 0   | 0 | 0   | 100   |
| 350 | --- |    | 0   | 0 | 0   | 100   |
| 5   | --- |    | 0   | 0 | 0   | 100   |
| 300 | --- |    | 0   | 0 | 0   | 100   |
| 25  | --- | 55 | 0   | 0 | 0   | 100   |
| 25  | --- |    | 0   | 0 | 0   | 100   |
| 32  | --- |    | 0   | 0 | 0   | 100   |
| 20  | --- |    | 0   | 0 | 0   | 100   |
| 55  | --- |    | 0   | 0 | 0   | 100   |
| 330 | --- |    | 0   | 0 | 0   | 100   |
| 310 | --- |    | 0   | 0 | 0   | 100   |
| 28  | --- |    | 0   | 0 | 0   | 100   |
| 15  | --- |    | 0   | 0 | 1   | 100   |
| 345 | --- |    | 0   | 0 | 0   | 100   |
| 90  | --- |    | 0   | 0 | 0   | 100   |
| 60  | --- |    | 0   | 0 | 0   | 100   |
| 320 | --- |    | 0   | 0 | 0   | 100   |
| 60  | --- |    | 0   | 0 | 0   | 100   |
| 80  | --- |    | 0   | 0 | 0   | 100   |
| 335 | --- |    | 0   | 0 | 0   | 100   |
| 55  | --- |    | 0   | 0 | 0   | 100   |
| 260 | --- |    | 0   | 0 | 0   | 100   |
| 340 | --- |    | 0   | 0 | 0   | 100   |
| 340 | --- |    | 0   | 0 | 0   | 100   |
| 75  | --- |    | 0   | 0 | 0   | 100   |
| 2   | --- |    | 0   | 0 | 1   | ---   |
| 40  | --- |    | --- | 0 | 1   | ---   |
| 80  | --- |    | --- | 0 | 1   | ---   |
| 80  | --- |    | 1   | 0 | 1   | ---   |
| 80  | --- |    | 1   | 0 | 1   | ---   |
| 355 | --- |    | 0   | 1 | --- | ---   |
| 310 | --- |    | --- | 1 | --- | ---   |
| 330 | --- |    | 0   | 0 | 1   | ---   |
| 70  | --- |    | 0   | 0 | 1   | ---   |
| 25  | --- |    | 1   | 0 | 1   | ---   |
| 45  | 30  |    | 1   | 1 | 1   | ---   |
| 10  | --- |    | 1   | 1 | 1   | ---   |
| 40  | --- |    | 1   | 0 | 1   | ---   |
| 90  | --- |    | 0   | 0 | 1   | ---   |
| 25  | --- |    | 1   | 0 | 1   | ---   |
| 60  | --- |    | 1   | 0 | 1   | ---   |
| 40  | --- |    | 1   | 0 | 1   | ---   |
| 350 | --- |    | 1   | 0 | 1   | ---   |
| 0   | --- |    | 1   | 0 | 1   | ---   |
| 35  | --- |    | 0   | 0 | 1   | ---   |

Data Repository item 2005026

|     |     |     |     |     |     |
|-----|-----|-----|-----|-----|-----|
| 348 | --- | 0   | 0   | 0   | --- |
| 260 | 90  | 0   | 0   | --- | --- |
| 20  | --- | 0   | 0   | 0   | --- |
| 3   | 90  | 0   | 0   | 1   | --- |
| 330 | --- | 0   | 0   | 1   | --- |
| 50  | --- | 0   | 0   | 1   | --- |
| 345 | --- | 0   | 0   | 1   | --- |
| 320 | --- | 0   | 0   | 1   | --- |
| 45  | --- | 0   | 0   | 1   | --- |
| 345 | --- | 0   | 0   | 1   | --- |
| 35  | --- | 0   | 0   | 1   | --- |
| 224 | --- | 0   | 0   | 1   | --- |
| 2   | 0   | 0   | 0   | 1   | --- |
| 330 | --- | 1   | --- | 1   | --- |
| 330 | --- | 0   | 0   | --- | --- |
| 45  | --- | 0   | 0   | --- | --- |
| 358 | 90  | 0   | 0   | 1   | --- |
| 90  | 90  | 0   | 0   | 1   | --- |
| 3   | --- | 0   | 0   | 1   | --- |
| 2   | 90  | 0   | 1   | 1   | --- |
| 22  | --- | --- | --- | 1   | --- |
| 65  | --- | --- | --- | 1   | --- |
| 110 | --- | 1   | --- | 1   | --- |
| 315 | --- | 0   | 0   | 1   | --- |
| 350 | --- | 0   | 0   | 1   | --- |
| 15  | --- | 0   | 0   | 1   | --- |
| 110 | --- | 0   | 0   | 1   | --- |
| 86  | --- | 0   | 0   | 1   | --- |
| 350 | --- | 0   | 0   | 1   | --- |
| 110 | --- | --- | --- | 1   | --- |
| 355 | --- | 0   | 0   | 1   | --- |
| 110 | --- | 0   | 0   | 1   | --- |
| 341 | --- | 0   | 0   | 1   | --- |
| 50  | --- | 1   | 1   | 0   | 0   |
| 85  | --- | 1   | 1   | 0   | 0   |
| 345 | --- | 1   | 1   | --- | 0   |
| 21  | --- | 1   | 1   | --- | --- |
| 63  | --- | --- | 1   | --- | --- |
| 341 | --- | --- | --- | --- | --- |
| 29  | --- | 1   | 1   | 0   | --- |
| 299 | --- | 1   | 1   | 0   | --- |
| 11  | --- | 1   | 0   | 0   | --- |
| 92  | --- | 1   | 0   | 0   | --- |
| 13  | --- | 1   | 1   | 0   | --- |
| 60  | --- | 1   | 1   | --- | --- |
| 341 | --- | 1   | 1   | --- | --- |
| 57  | --- | 1   | 1   | --- | --- |
| 307 | --- | 1   | 1   | --- | --- |
| 358 | --- | 1   | 1   | --- | --- |
| 19  | --- | 1   | 1   | --- | --- |
| 292 | --- | 1   | 1   | --- | --- |
| 16  | 21  | 1   | 0   | --- | --- |

|     |     |     |     |     |     |
|-----|-----|-----|-----|-----|-----|
| 94  | --- | 1   | 0   | --- | --- |
| 89  | --- | --- | --- | --- | --- |
| 354 | --- | --- | --- | --- | --- |
| 17  | --- | 1   | 1   | --- | --- |
| 341 | --- | 1   | 1   | --- | --- |
| 305 | --- | 1   | 1   | --- | --- |
| 87  | --- | 1   | 1   | --- | --- |
| 359 | --- | 1   | 1   | --- | --- |
| 99  | --- | 1   | 1   | --- | --- |
| 15  | 68  | 1   | 1   | --- | --- |
| 109 | --- | 1   | 1   | --- | --- |
| 352 | --- | 1   | 1   | --- | --- |
| 115 | --- | 1   | 1   | --- | --- |
| 49  | --- | 1   | 1   | --- | --- |
| 84  | 90  | --- | --- | --- | --- |
| 24  | --- | --- | --- | --- | --- |
| 13  | 28  | --- | --- | --- | --- |
| 6   | --- | 1   | 1   | --- | --- |
| 352 | --- | 1   | 1   | --- | --- |
| 74  | --- | 1   | 1   | --- | --- |
| 312 | 90  | 1   | 1   | --- | --- |
| 12  | --- | 1   | 1   | --- | --- |
| 64  | --- | 1   | 1   | --- | --- |
| 348 | --- | 0   | 1   | --- | --- |
| 99  | --- | 0   | --- | --- | --- |
| 9   | --- | 1   | 1   | 0   | 5   |
| 4   | --- | 1   | 1   | 1   | 5   |
| 348 | --- | 1   | 1   | 1   | 5   |
| 358 | --- | 1   | 1   | 1   | --- |
| 295 | --- | 1   | 1   | 1   | --- |
| 40  | --- | 1   | 1   | 1   | --- |
| 350 | --- | 1   | 0   | --- | --- |
| 275 | --- | 1   | 1   | --- | --- |
| 8   | --- | 1   | 1   | 0   | --- |
| 293 | --- | 1   | 1   | --- | --- |
| 11  | --- | 1   | 1   | 1   | --- |
| 335 | --- | 1   | 1   | 1   | --- |
| 31  | --- | 1   | 1   | 1   | --- |
| 315 | --- | 1   | 1   | 1   | --- |
| 54  | --- | 1   | 1   | 1   | --- |
| 14  | --- | 1   | 1   | 1   | --- |
| 14  | --- | 1   | 1   | --- | --- |
| 329 | --- | 1   | 1   | --- | --- |
| 253 | --- | 1   | 1   | 1   | --- |
| 22  | --- | 1   | 1   | --- | --- |
| 305 | --- | 1   | 1   | --- | --- |
| 297 | --- | 1   | 1   | --- | --- |
| 41  | --- | 1   | 1   | 1   | --- |
| 358 | --- | 1   | 1   | 1   | --- |
| 300 | --- | 1   | 1   | --- | --- |
| 32  | --- | 1   | 1   | 1   | --- |

## Data Repository item 2005026

|     |     |    |     |     |     |     |
|-----|-----|----|-----|-----|-----|-----|
| 345 | --- |    | 1   | 1   | --- | --- |
| 57  | --- |    | 1   | 1   | --- | --- |
| 33  | --- |    | 1   | 1   | --- | --- |
| 332 | --- |    | 1   | 1   | --- | --- |
| 93  | --- |    | 1   | 1   | --- | --- |
| 357 | --- |    | 1   | 1   | --- | --- |
| 322 | --- |    | 1   | 1   | --- | --- |
| 285 | --- |    | 1   | 1   | --- | --- |
| 35  | --- |    | 1   | 1   | --- | --- |
| 20  | --- |    | 1   | 1   | --- | --- |
| 56  | --- |    | 1   | 1   | --- | --- |
| 46  | --- |    | 1   | 1   | --- | --- |
| 359 | --- |    | 1   | 1   | --- | --- |
| 61  | --- |    | 1   | 1   | --- | --- |
| 307 | --- |    | 1   | 1   | --- | --- |
| 333 | --- |    | 1   | 1   | --- | --- |
| 11  | --- |    | 1   | 1   | 1   | --- |
| 47  | --- |    | 1   | 0   | 0   | --- |
| 325 | --- |    | 1   | 1   | 0   | --- |
| 47  | --- |    | 1   | 1   | 0   | --- |
| 109 | --- |    | 1   | 1   | 0   | --- |
| 310 | --- | 60 | 1   | 1   | 0   | --- |
| 66  | --- |    | 1   | 1   | 0   | --- |
| 26  | --- |    | 1   | 1   | 0   | --- |
| 60  | --- |    | 1   | 1   | 0   | --- |
| 10  | --- |    | 1   | 1   | 0   | --- |
| 134 | --- |    | 1   | 1   | 0   | --- |
| 325 | --- |    | 1   | 1   | 0   | --- |
| 24  | --- |    | 1   | 1   | 0   | --- |
| 336 | --- |    | 1   | 1   | 0   | --- |
| 332 | --- |    | 1   | 1   | 0   | --- |
| 97  | --- |    | 1   | 1   | 0   | --- |
| 325 | --- | 50 | 1   | 1   | 0   | --- |
| 69  | --- | 50 | 1   | 1   | 0   | --- |
| 2   | --- |    | 1   | 1   | 0   | --- |
| 295 | --- |    | 1   | 1   | 0   | --- |
| 322 | --- |    | 1   | 1   | 0   | --- |
| 4   | --- |    | 1   | 1   | 0   | --- |
| 75  | --- |    | 1   | 1   | 0   | --- |
| 340 | --- |    | 1   | 1   | 0   | --- |
| 320 | --- |    | 1   | 1   | 0   | --- |
| 11  | --- |    | 1   | 1   | --- | --- |
| 320 | --- |    | --- | --- | --- | --- |
| 350 | --- |    | --- | --- | --- | --- |
| 40  | --- |    | --- | --- | --- | --- |
| 29  | --- |    | --- | --- | --- | --- |
| 90  | --- |    | --- | --- | --- | --- |
| 10  | --- |    | --- | --- | --- | --- |
| 329 | --- |    | --- | --- | --- | --- |
| 70  | --- |    | --- | --- | --- | --- |
| 13  | --- | 30 | --- | --- | --- | --- |
| 349 | --- |    | 1   | 1   | --- | --- |



|     |     |     |     |     |     |
|-----|-----|-----|-----|-----|-----|
| 30  | 90  | 1   | 1   | --- | --- |
| 355 | --- | 1   | 1   | --- | --- |
| 23  | --- | 1   | 1   | --- | --- |
| 358 | --- | 1   | --- | --- | --- |
| 340 | --- | 1   | --- | --- | --- |
| 355 | --- | 1   | --- | --- | --- |
| 358 | --- | 1   | --- | --- | --- |
| 85  | --- | --- | --- | --- | --- |
| 52  | --- | --- | --- | --- | --- |
| 357 | --- | --- | --- | --- | --- |
| 80  | --- | --- | --- | --- | --- |
| 6   | --- | --- | --- | --- | --- |
| 322 | --- | --- | 1   | --- | --- |
| 305 | --- | --- | 1   | --- | --- |
| 20  | --- | --- | 1   | --- | --- |
| 80  | --- | --- | --- | --- | --- |
| 337 | --- | --- | --- | --- | --- |
| 80  | --- | --- | --- | --- | --- |
| 336 | --- | --- | --- | --- | --- |
| 14  | --- | --- | --- | --- | --- |
| 20  | --- | --- | --- | --- | --- |
| 292 | --- | --- | --- | --- | --- |
| 348 | --- | --- | --- | --- | --- |
| 339 | --- | --- | --- | --- | --- |
| 329 | --- | --- | --- | --- | --- |
| 314 | --- | --- | --- | --- | --- |
| 80  | --- | --- | --- | --- | --- |
| 30  | --- | --- | --- | --- | --- |
| 92  | --- | --- | --- | --- | --- |
| 60  | --- | --- | --- | --- | --- |
| 336 | --- | --- | --- | --- | --- |
| 8   | --- | --- | --- | --- | --- |
| 100 | --- | --- | --- | --- | --- |
| 65  | --- | --- | --- | --- | --- |
| 48  | --- | --- | --- | --- | --- |
| 331 | --- | --- | --- | --- | --- |
| 58  | --- | --- | --- | --- | --- |
| 346 | --- | --- | --- | --- | --- |
| 331 | --- | --- | --- | --- | --- |
| 24  | --- | --- | --- | --- | --- |
| 71  | --- | --- | --- | --- | --- |
| 260 | --- | --- | --- | --- | --- |
| 2   | --- | --- | --- | --- | --- |
| 321 | --- | --- | --- | --- | --- |
| 45  | --- | --- | --- | --- | --- |
| 0   | --- | --- | --- | --- | --- |
| 60  | --- | --- | --- | --- | --- |
| 319 | --- | --- | --- | --- | --- |
| 79  | --- | --- | --- | --- | --- |
| 4   | --- | --- | --- | --- | --- |
| 59  | --- | --- | --- | --- | --- |
| 348 | --- | --- | --- | --- | --- |

|     |     |     |     |     |     |
|-----|-----|-----|-----|-----|-----|
| 346 | --- | --- | --- | --- | --- |
| 65  | --- | --- | --- | --- | --- |
| 300 | --- | --- | --- | --- | --- |
| 328 | --- | --- | --- | --- | --- |
| 340 | --- | --- | --- | --- | --- |
| 328 | --- | --- | --- | --- | --- |
| 9   | --- | --- | --- | --- | --- |
| 16  | --- | --- | --- | --- | --- |
| 90  | --- | --- | --- | --- | --- |
| 355 | --- | --- | --- | --- | --- |
| 349 | --- | --- | --- | --- | --- |
| 290 | --- | --- | --- | --- | --- |
| 65  | --- | --- | --- | --- | --- |
| 50  | --- | --- | --- | --- | --- |
| 310 | --- | --- | --- | --- | --- |
| 293 | --- | --- | --- | --- | --- |
| 312 | --- | --- | --- | --- | --- |
| 38  | --- | --- | --- | --- | --- |
| 331 | --- | --- | --- | --- | --- |
| 26  | --- | --- | --- | --- | --- |
| 19  | --- | --- | --- | --- | --- |
| 80  | --- | --- | --- | --- | --- |
| 62  | --- | --- | --- | --- | --- |
| 325 | --- | 1   | 1   | 0   | --- |
| 17  | --- | 1   | --- | 0   | --- |
| 27  | --- | 1   | --- | 0   | --- |
| 290 | --- | 1   | --- | 0   | --- |
| 38  | --- | 1   | --- | 0   | --- |
| 2   | --- | 1   | --- | 0   | --- |
| 48  | --- | 1   | --- | 0   | --- |
| 36  | --- | 1   | --- | 0   | --- |
| 330 | --- | 1   | --- | 0   | --- |
| 10  | --- | 1   | --- | 0   | --- |
| 76  | --- | 1   | --- | 0   | --- |
| 3   | --- | 1   | --- | 0   | --- |
| 101 | --- | 1   | --- | 0   | --- |
| 347 | --- | 1   | --- | 0   | --- |
| 89  | --- | 1   | --- | 0   | --- |
| 346 | --- | 1   | --- | 0   | --- |
| 317 | --- | 1   | --- | 0   | --- |
| 262 | --- | 1   | --- | 0   | --- |
| 11  | --- | 1   | --- | 0   | --- |
| 11  | --- | 1   | --- | 0   | --- |
| 80  | --- | 1   | --- | 0   | --- |
| 333 | --- | --- | --- | --- | --- |
| 335 | --- | --- | --- | --- | --- |
| 242 | --- | --- | --- | --- | --- |
| 335 | --- | --- | --- | --- | --- |
| 17  | --- | --- | --- | --- | --- |
| 312 | --- | --- | --- | --- | --- |
| 352 | --- | --- | --- | --- | --- |
| 87  | --- | --- | --- | --- | --- |

Data Repository item 2005026

|     |     |     |     |     |     |
|-----|-----|-----|-----|-----|-----|
| 50  | --- | --- | --- | --- | --- |
| 33  | --- | 0   | 0   | 0   | 0   |
| 90  | 90  | 0   | 0   | 0   | 0   |
| 26  | --- | 0   | 0   | 0   | 0   |
| 335 | --- | 0   | --- | 0   | --- |
| 105 | --- | 0   | --- | 0   | --- |
| 16  | --- | 0   | --- | 0   | --- |
| 282 | --- | 0   | --- | --- | --- |
| 265 | --- | 0   | --- | --- | --- |
| 3   | --- | 0   | --- | --- | --- |
| 24  | --- | 0   | --- | --- | --- |
| 350 | --- | 0   | --- | --- | --- |
| 327 | --- | --- | --- | --- | --- |
| 354 | --- | --- | --- | --- | --- |
| 75  | --- | --- | --- | --- | --- |
| 22  | --- | --- | --- | --- | --- |
| 330 | --- | --- | --- | --- | --- |
| 5   | --- | --- | --- | --- | --- |
| 30  | --- | --- | --- | --- | --- |
| 308 | --- | --- | --- | --- | --- |
| 14  | --- | --- | --- | --- | --- |
| 300 | --- | --- | --- | --- | --- |
| 80  | --- | --- | --- | --- | --- |
| 313 | --- | --- | --- | --- | --- |
| 6   | --- | 0   | 0   | 1   | --- |
| 320 | --- | 0   | 0   | 1   | --- |
| 335 | --- | 0   | 0   | 1   | --- |
| 22  | --- | --- | --- | --- | --- |
| 34  | --- | --- | --- | --- | --- |
| 356 | --- | --- | --- | --- | --- |
| 65  | --- | 25  | --- | --- | --- |
| 328 | --- | --- | --- | --- | --- |
| 39  | 90  | --- | --- | --- | --- |
| 17  | --- | --- | --- | --- | --- |
| 300 | --- | --- | --- | --- | --- |
| 280 | --- | --- | --- | 1   | --- |
| 5   | --- | --- | --- | --- | --- |
| 40  | --- | --- | --- | --- | --- |
| 65  | --- | --- | --- | --- | --- |
| 28  | --- | --- | --- | --- | --- |
| 320 | 30  | 30  | --- | --- | --- |
| 325 | --- | --- | --- | --- | --- |
| 59  | --- | --- | --- | --- | --- |
| 80  | --- | --- | --- | 1   | --- |
| 355 | --- | --- | --- | --- | --- |
| 15  | --- | --- | --- | --- | --- |
| 39  | 90  | 0   | --- | 1   | --- |
| 98  | --- | 0   | --- | --- | --- |
| 65  | --- | --- | --- | --- | --- |
| 345 | --- | --- | --- | --- | --- |
| 75  | --- | --- | --- | --- | --- |
| 18  | --- | --- | --- | --- | --- |

Data Repository item 2005026

|     |     |     |     |     |     |
|-----|-----|-----|-----|-----|-----|
| 16  | --- | --- | 1   | --- | --- |
| 110 | --- | --- | --- | --- | --- |
| 40  | --- | --- | --- | --- | --- |
| 340 | --- | --- | --- | --- | --- |
| 357 | --- | --- | --- | --- | --- |
| 39  | --- | --- | --- | --- | --- |
| 23  | --- | --- | --- | --- | --- |
| 356 | --- | --- | --- | --- | --- |
| 65  | --- | --- | --- | --- | --- |
| 115 | --- | --- | --- | --- | --- |
| 21  | 90  | --- | 1   | --- | --- |
| 79  | --- | --- | --- | --- | --- |
| 120 | --- | --- | --- | --- | --- |
| 20  | --- | --- | 1   | --- | --- |
| 350 | --- | --- | --- | --- | --- |
| 310 | --- | --- | --- | --- | --- |
| 54  | --- | --- | --- | --- | --- |
| 35  | --- | --- | 0   | 1   | --- |
| 80  | --- | --- | --- | --- | --- |
| 113 | --- | --- | --- | --- | --- |
| 330 | --- | --- | 0   | --- | --- |
| 60  | --- | --- | --- | --- | --- |
| 13  | --- | --- | 1   | --- | --- |
| 85  | --- | --- | --- | --- | --- |
| 349 | --- | --- | --- | --- | --- |
| 334 | --- | --- | --- | --- | --- |
| 58  | --- | --- | --- | --- | --- |
| 110 | --- | --- | --- | --- | --- |
| 28  | --- | --- | --- | --- | --- |
| 340 | --- | --- | --- | --- | --- |
| 325 | 60  | --- | --- | --- | --- |
| 38  | --- | --- | --- | --- | --- |
| 314 | --- | --- | --- | --- | --- |
| 34  | --- | --- | --- | --- | --- |
| 359 | --- | --- | --- | --- | --- |
| 80  | --- | --- | --- | --- | --- |
| 336 | --- | --- | --- | --- | --- |
| 79  | --- | --- | --- | --- | --- |
| 354 | 90  | --- | 1   | --- | --- |
| 330 | --- | --- | --- | --- | --- |
| 299 | 90  | --- | --- | --- | --- |
| 355 | --- | --- | --- | --- | --- |
| 42  | --- | --- | --- | --- | --- |
| 339 | --- | --- | --- | --- | --- |
| 65  | --- | --- | --- | --- | --- |
| 351 | --- | --- | --- | --- | --- |
| 85  | --- | --- | --- | --- | --- |
| 352 | --- | --- | --- | --- | --- |
| 19  | --- | --- | --- | --- | --- |
| 68  | --- | --- | --- | --- | --- |
| 22  | --- | --- | --- | --- | --- |
| 346 | --- | --- | --- | --- | --- |

Data Repository item 2005026

|     |     |     |     |     |     |
|-----|-----|-----|-----|-----|-----|
| 2   | 90  | --- | --- | --- | --- |
| 97  | --- | --- | --- | --- | --- |
| 107 | --- | --- | --- | --- | --- |
| 105 | --- | --- | --- | --- | --- |
| 8   | --- | --- | --- | --- | --- |
| 60  | --- | --- | --- | --- | --- |
| 16  | --- | --- | --- | --- | --- |
| 340 | --- | --- | --- | --- | --- |
| 65  | --- | --- | --- | --- | --- |
| 110 | --- | --- | --- | --- | --- |
| 2   | --- | --- | --- | --- | --- |
| 40  | --- | --- | --- | --- | --- |
| 336 | --- | --- | --- | --- | --- |
| 3   | 15  | --- | --- | --- | --- |
| 36  | --- | --- | --- | --- | --- |
| 350 | --- | --- | --- | --- | --- |
| 305 | --- | --- | --- | --- | --- |
| 306 | --- | --- | --- | --- | --- |
| 54  | --- | --- | --- | --- | --- |
| 344 | 90  | --- | --- | --- | --- |
| 56  | --- | --- | --- | --- | --- |
| 4   | --- | --- | --- | --- | --- |
| 45  | --- | --- | --- | --- | --- |
| 340 | --- | --- | --- | --- | --- |
| 110 | --- | --- | --- | --- | --- |
| 38  | 90  | --- | --- | --- | --- |
| 65  | --- | --- | --- | --- | --- |
| 0   | --- | --- | --- | --- | --- |
| 75  | --- | --- | --- | --- | --- |
| 24  | --- | --- | --- | --- | --- |
| 95  | --- | --- | --- | --- | --- |
| 25  | --- | --- | --- | --- | --- |
| 10  | --- | --- | --- | --- | --- |
| 105 | --- | --- | --- | --- | --- |
| 29  | --- | --- | --- | --- | --- |
| 105 | --- | --- | --- | --- | --- |
| 0   | --- | --- | --- | --- | --- |
| 42  | --- | --- | --- | --- | --- |
| 342 | --- | --- | --- | --- | --- |
| 310 | --- | --- | --- | --- | --- |
| 16  | --- | --- | --- | --- | --- |
| 30  | --- | --- | --- | --- | --- |
| 346 | --- | --- | --- | --- | --- |
| 35  | 90  | --- | --- | --- | --- |
| 340 | --- | --- | --- | --- | --- |
| 115 | --- | --- | --- | --- | --- |
| 35  | 90  | --- | --- | --- | --- |
| 340 | --- | --- | --- | --- | --- |
| 37  | 11  | --- | --- | --- | --- |
| 60  | --- | --- | --- | --- | --- |
| 345 | --- | --- | --- | --- | --- |
| 30  | --- | --- | --- | --- | --- |

Data Repository item 2005026

|     |     |     |     |     |       |
|-----|-----|-----|-----|-----|-------|
| 70  | --- | --- | --- | --- | ---   |
| 110 | --- | --- | --- | --- | ---   |
| 100 | 90  | --- | --- | --- | ---   |
| 0   | --- | --- | --- | --- | ---   |
| 330 | --- | --- | --- | --- | ---   |
| 193 | --- | 1   | 1   | 0   | 80    |
| 318 | --- | --- | --- | --- | ---   |
| 347 | --- | 1   | 1   | 0   | 10    |
| 66  | 35  | 1   | 1   | --- | 50    |
| 30  | 208 | 1   | --- | --- | ---   |
| --- | --- | --- | --- | --- | ---   |
| 160 | --- | 1   | 1   | --- | 10-20 |
| 190 | --- | 1   | --- | --- | ---   |
| 262 | --- | 1   | --- | --- | ---   |
| 215 | --- | 1   | --- | --- | ---   |
| 66  | --- | 1   | 1   | --- | 50    |
| 53  | --- | --- | --- | --- | ---   |
| 48  | --- | --- | --- | --- | ---   |
| 15  | --- | --- | --- | --- | ---   |
| 297 | --- | 1   | 1   | --- | 10    |
| 312 | --- | --- | --- | --- | ---   |
| 167 | --- | --- | --- | --- | ---   |
| 218 | --- | --- | --- | --- | 25    |
| 310 | --- | --- | --- | --- | ---   |
| 290 | --- | --- | --- | --- | ---   |
| 212 | --- | --- | --- | --- | ---   |
| 99  | --- | 1   | 1   | --- | 10    |
| 99  | --- | --- | --- | --- | ---   |
| 27  | --- | --- | --- | --- | ---   |
| 215 | --- | 1   | 1   | --- | 10    |
| 245 | --- | --- | --- | --- | ---   |
| 320 | --- | 1   | --- | --- | 10    |
| 343 | --- | --- | --- | --- | ---   |
| 288 | --- | --- | --- | --- | ---   |
| 352 | --- | --- | --- | --- | ---   |
| 265 | --- | --- | --- | --- | ---   |
| 175 | 30  | 1   | --- | --- | ---   |
| 270 | 300 | --- | --- | --- | ---   |
| 351 | --- | 1   | 1   | --- | ---   |
| 290 | --- | --- | --- | --- | ---   |
| 317 | --- | --- | --- | --- | ---   |
| 343 | --- | --- | --- | --- | ---   |
| 310 | --- | --- | --- | --- | ---   |
| 326 | --- | 1   | 1   | --- | ---   |
| 292 | --- | --- | --- | --- | ---   |
| 58  | --- | --- | --- | --- | ---   |
| 325 | --- | 1   | 1   | --- | ---   |
| 310 | --- | 1   | 1   | --- | ---   |
| 356 | --- | --- | --- | --- | ---   |
| 312 | --- | --- | --- | --- | ---   |
| 40  | --- | --- | --- | --- | ---   |
| 314 | --- | --- | --- | --- | ---   |

Data Repository item 2005026

|     |     |     |     |     |       |
|-----|-----|-----|-----|-----|-------|
| 21  | --- | 1   | 1   | --- | ---   |
| 3   | --- | --- | --- | --- | ---   |
| 320 | --- | --- | --- | --- | ---   |
| 16  | --- | 1   | 1   | --- | ---   |
| 18  | --- | --- | --- | --- | ---   |
| 308 | --- | --- | --- | --- | ---   |
| 28  | --- | --- | --- | --- | ---   |
| 88  | --- | --- | --- | --- | ---   |
| 342 | --- | 1   | 1   | --- | 10    |
| 58  | --- | --- | --- | --- | ---   |
| 46  | --- | 1   | 1   | --- | 30    |
| 22  | --- | --- | --- | --- | ---   |
| 0   | --- | 1   | 1   | --- | 5     |
| 8   | --- | --- | --- | --- | ---   |
| 348 | --- | --- | --- | --- | ---   |
| 3   | --- | --- | --- | --- | ---   |
| 273 | --- | --- | --- | --- | ---   |
| 55  | --- | --- | --- | --- | ---   |
| 0   | --- | 1   | 1   | --- | 0     |
| 12  | --- | --- | --- | --- | ---   |
| 33  | --- | --- | --- | --- | ---   |
| 67  | --- | --- | --- | --- | ---   |
| 314 | --- | 1   | 1   | --- | 15-20 |
| 233 | --- | --- | --- | --- | ---   |
| 295 | --- | 1   | 1   | --- | 5     |
| 234 | --- | --- | --- | --- | ---   |
| 348 | --- | --- | --- | --- | ---   |
| 299 | --- | --- | --- | --- | 5     |
| 37  | --- | --- | --- | --- | ---   |
| 78  | --- | --- | --- | --- | 5     |
| 352 | --- | --- | --- | --- | ---   |
| 99  | --- | --- | --- | --- | ---   |

Data Repository Table 2: Rock Surface Temperature measurements for 9 clasts. Rocks 1-7 are located in the San Bernardino Mountains and data was collected in summer. Rock 8 is located in San Lorenzo Site and data was collected in winter. See manuscript text for details on methodology and field locations.

Them. Orient = the orientation of a line projected from the top of the clast to the position of the center of the thermometer.  
face orientation = dip direction, angle of the surface on which the thermometer is located  
--- = no data collected

|               |                                 |         |                 |         |         |      |               |     |    |
|---------------|---------------------------------|---------|-----------------|---------|---------|------|---------------|-----|----|
| Rock #1       | Crack types and orientations    |         | o, 336; o, 20   |         |         |      |               |     |    |
|               | Clast length (cm), orientation  |         | 38, 93          |         |         |      |               |     |    |
|               | Clast width (cm)                |         | 25              |         |         |      |               |     |    |
|               | Ht. Above surface (cm)          |         | 24              |         |         |      |               |     |    |
|               | Location                        |         | Qyf3; st. 19    |         |         |      |               |     |    |
|               | Color                           |         | Buff tan        |         |         |      |               |     |    |
|               | Ground Surface Aspect           |         | 240             |         |         |      |               |     |    |
|               | Ground Surface Slope            |         | 8               |         |         |      |               |     |    |
|               | Clast Lithology                 |         | Meta-sed        |         |         |      |               |     |    |
|               | North                           | East    | South           | West    | Top     | Time | Air Temp (°F) |     |    |
|               | #1                              | #2      | #3              | #4      | #5      |      |               |     |    |
| Therm. Orient | ---                             | ---     | ---             | ---     | ---     | ---  | ---           |     |    |
| Face Orient.  | ---                             | ---     | ---             | ---     | ---     | ---  | ---           |     |    |
|               | Temp °C                         | Temp °C | Temp °C         | Temp °C | Temp °C |      |               |     |    |
|               | 40.5                            |         | 58              | 55      | 48      | 53   | 11:00 AM      | --- |    |
|               | 44                              |         | 58              | 58      | 53      | 56   | 12            | --- |    |
|               | 52                              |         | 58              | 60      | 60      | 62   | 14:30         |     | 99 |
|               | 50                              |         | 54              | 56      | 58      | 59   | 15:30         | --- |    |
| Rock #2       | Crack types and orientations    |         | o,4             |         |         |      |               |     |    |
|               | B-axis length (cm), orientation |         | 33,260          |         |         |      |               |     |    |
|               | A axis length (cm)              |         | 26              |         |         |      |               |     |    |
|               | Ht. Above surface (cm)          |         | 17              |         |         |      |               |     |    |
|               | Location                        |         | Qyf2            |         |         |      |               |     |    |
|               | Color                           |         | white/off white |         |         |      |               |     |    |
|               | Ground Surface Aspect           |         | -               |         |         |      |               |     |    |
|               | Ground Surface Slope            |         | flat            |         |         |      |               |     |    |



|               | Lithology   |            | Meta-sed    |            |           | Time | Air Temp (°F) |
|---------------|-------------|------------|-------------|------------|-----------|------|---------------|
|               | North<br>#1 | East<br>#2 | South<br>#3 | West<br>#4 | Top<br>#5 |      |               |
|               | Temp °C     | Temp °C    | Temp °C     | Temp °C    | Temp °C   |      |               |
| Therm. Orient | 13          |            | 100         | 180        | 256       | none |               |
| Face Orient.  | ---         | ---        | ---         | ---        | ---       |      |               |
|               | 50          |            | 55          | 48         | 42        | ---  | 10:00 84      |
|               | 54          |            | 60          | 53         | 52        | ---  | 11:00 ---     |
|               | 60          |            | 66          | 61         | 62        | ---  | 12:00 99      |
|               | 62          |            | 68          | 66         | 65        | ---  | 13:00 ---     |

Rock #3

Crack types and orientations o,321; o,12; j,270

B-axis length (cm), orientation 21;75

A axis length (cm) 19

Ht. Above surface (cm) 12

Location Station 24

Color lite grey

Ground Surface Aspect -

Ground Surface Slope flat

Lithology Limestone

|               | North<br>#1 | East<br>#2 | South<br>#3 | West<br>#4 | Top<br>#5 | Time | Air Temp (°F) |
|---------------|-------------|------------|-------------|------------|-----------|------|---------------|
|               | Temp °C     | Temp °C    | Temp °C     | Temp °C    | Temp °C   |      |               |
|               | Temp °C     | Temp °C    | Temp °C     | Temp °C    | Temp °C   |      |               |
| Therm. Orient | 345         |            | 90          | 180        | 270       | 60   |               |
| Face Orient.  | 30/34       | 120/90     | 215/90      | 275/38     | 30/34     |      |               |
| Temp °C       | 34          |            | 42          | 26         | 26        | 41   | 9:00 71       |
|               | 46          |            | 56          | 46         | 44        | 54   | 11:00 ---     |
|               | 52          |            | 58          | 50         | 51        | 57   | 12:00 ---     |
|               | 56          |            | 55          | 56         | 58        | 61   | 13:00 ---     |
|               | 56          |            | 54          | 58         | 60        | 60   | 14:00 90      |
|               | 55          |            | 52          | 58         | 58        | 56   | 15:00 ---     |
|               | 53          |            | 48          | 57         | 59        | 52   | 16:00 ---     |
|               | 46          |            | 38          | 40         | 46        | 38   | 18:00 ---     |

39 35 34 40 34 19:00 ---

Rock #4

|                                 |                   |
|---------------------------------|-------------------|
| Crack types and orientations    | o, 42;o,310;o,350 |
| B-axis length (cm), orientation | 15                |
| A axis length (cm)              | 14                |
| Ht. Above surface (cm)          | 8                 |
| Location                        | Blackhawk         |
| Color                           | Dark Grey         |
| Ground Surface Aspect           | -                 |
| Ground Surface Slope            | flat              |
| Lithology                       | Limestone         |

|               | North<br>#1 | East<br>#2 | South<br>#3 | West<br>#4 | Top<br>#5 | Time      | Air Temp (°F) |
|---------------|-------------|------------|-------------|------------|-----------|-----------|---------------|
| Therm. Orient | 0           | 90         | 170         | 275        | 45        |           |               |
| Face Orient.  | 0/90        | 70/55      | 145/80      | 275/28     | 45/32     |           |               |
|               | Temp °C     | Temp °C    | Temp °C     | Temp °C    | Temp °C   |           |               |
|               | 44          | 58         | 52          | 36         | 50        | 9:30      | 80            |
|               | 46          | 60         | 60          | 44         | 56        | 10:00 --- |               |
|               | 50          | 64         | 68          | 54         | 62        | 11:00     | 86            |
|               | 53          | 64         | 70          | 62         | 63        | 12:00     | 90            |
|               | 56          | 64         | 72          | 68         | 65        | 13:00     | 90            |
|               | 57          | 61         | 71          | 70         | 63        | 14:00     | 92            |
|               | 58          | 52         | 64          | 72         | 60        | 15:30     | 94            |
|               | 57          | 48         | 58          | 70         | 55        | 16:30     | 93            |
|               | 53          | 44         | 51          | 62         | 47        | 17:30     | 89            |

Rock #5

|                                 |                 |
|---------------------------------|-----------------|
| Crack types and orientations    | o,350; j,285    |
| B-axis length (cm), orientation | 20,80           |
| A axis length (cm)              | 15              |
| Ht. Above surface (cm)          | 6               |
| Location                        | Qvof2           |
| Color                           | rose pink/white |
| Ground Surface Aspect           | -               |
| Ground Surface Slope            | flat            |
| Lithology                       | qtzite          |

|               | North<br>#1 | East<br>#2 | South<br>#3 | West<br>#4 | Top<br>#5 | Time | Air Temp (°F) |
|---------------|-------------|------------|-------------|------------|-----------|------|---------------|
| Therm. Orient |             | 50         | 85          | 210        | 330       | -    |               |
| Face Orient.  | 0/53        | 130/58     | 240/90      | 0/53       | 235/12    |      |               |
|               | Temp °C     | Temp °C    | Temp °C     | Temp °C    | Temp °C   |      |               |
|               | 50          |            | 57          | 44         | 49        | 50   | 10:00         |
|               | 54          |            | 62          | 48         | 52        | 54   | 11:00 ---     |
|               | 60          |            | 64          | 58         | 54        | 56   | 12:00 ---     |
|               | 64          |            | 64          | 64         | 58        | 62   | 13:00 ---     |
|               | 66          |            | 64          | 64         | 62        | 62   | 14:00         |
|               | 66          |            | 56          | 64         | 60        | 60   | 15:00 ---     |
|               | 59          |            | 52          | 65         | 58        | 62   | 16:00         |

Rock #6

Crack types and orientations b/j, 320

B-axis length (cm), orientation ~40

A axis length (cm) ~20

Ht. Above surface (cm) ~20

Location old debris flow

Color dark brown

Ground Surface Aspect -

Ground Surface Slope flat

Lithology granit

Note: The 'east' therm. Was falling off during the day.

|               | North<br>#1 | East<br>#2                     | South<br>#3 | West<br>#4 | Top<br>#5 | Time    | Air Temp (°F) |
|---------------|-------------|--------------------------------|-------------|------------|-----------|---------|---------------|
| Therm. Orient |             | 10                             | 130         | 185        | 310       | -       |               |
| Face Orient.  | 50/90       | 125/-65 (overhung);post 1pm 7( | 220/90      | 310/37     | 70/25     |         |               |
|               | Temp °C     | Temp °C                        | Temp °C     | Temp °C    | Temp °C   | Temp °C |               |
|               | 48          |                                | 36          | 25         | 26        | 40      | 9:00          |
|               | 50          |                                | 38          | 28         | 30        | 46      | 10:00         |
|               | 50          |                                | 52          | 36         | 34        | 49      | 11:00         |
|               | 48          |                                | 54          | 43         | 39        | 52      | 12:00         |
|               | 40          |                                | 46          | 46         | 42        | 51      | 13:00         |
|               | 34          |                                | 32          | 44         | 46        | 45      | 14:00         |
|               | 34          |                                | 41          | 44         | 40        | 42      | 15:00         |
|               | 30          |                                | 33          | 40         | 41        | 37      | 16:00 ---     |

Rock #7

|                                 |                |
|---------------------------------|----------------|
| Crack types and orientations    | o,5;o,349;j,50 |
| B-axis length (cm), orientation | ~2 m           |
| A axis length (cm)              | ~1.5m          |
| Ht. Above surface (cm)          | ~1.5m          |
| Location                        | Qof3           |
| Color                           | grey/brown     |
| Ground Surface Aspect           | -              |
| Ground Surface Slope            | flat           |
| Lithology                       | granit         |

|               | North<br>#1 | East<br>#2 | South<br>#3 | West<br>#4 | Top<br>#5 | Time | Air Temp (°F) |
|---------------|-------------|------------|-------------|------------|-----------|------|---------------|
| Therm. Orient |             | 70         | 106         | 234        | 300       | -    |               |
| Face Orient.  | 4/55        | 142/59     | 226/90      | 305/61     | 128/9     |      |               |
|               | Temp °C     | Temp °C    | Temp °C     | Temp °C    | Temp °C   |      |               |
|               | 51          |            | 62          | 40         | 36        | 54   | 10:30 ---     |
|               | 49          |            | 56          | 54         | 46        | 56   | 13:30 ---     |
|               | 54          |            | 51          | 60         | 55        | 59   | 15:30 ---     |
|               | 52          |            | 43          | 52         | 58        | 52   | 18:00 ---     |

Rock #8

San Lorenzo Canyon

New Mexico

1/14/2002

|                                 |                           |
|---------------------------------|---------------------------|
| Crack types and orientations    | o,315;o,20                |
| B-axis length (cm), orientation | 46                        |
| A axis length (cm)              | 38                        |
| Ht. Above surface (cm)          | 28 cm                     |
| Location                        | late Holocene bar/terrace |
| Color                           | dove grey                 |
| Ground Surface Aspect           | -                         |
| Ground Surface Slope            | flat                      |
| Lithology                       | Rhyolite                  |

|               | North<br>#1  | East<br>#2  | South<br>#3 | West<br>#4 | Top<br>#5 | Time | Air Temp (°C) |
|---------------|--------------|-------------|-------------|------------|-----------|------|---------------|
| Therm. Orient | same as face | orientation |             |            |           |      | ~10           |
| Face Orient.  | 230/64       | 30/50       | 300/45      | 30/90      | 90/10 E   |      |               |
|               | Temp °C      | Temp °C     | Temp °C     | Temp °C    | Temp °C   |      |               |
|               | 6            |             | 20          | 10         | -4        | 12   | 9:20 ---      |

|    |    |    |    |    |                              |
|----|----|----|----|----|------------------------------|
| 6  | 25 | 18 | -4 | 19 | 10:00:00 A---                |
| 6  | 33 | 28 | 1  | 27 | 11:00 ---                    |
| 7  | 38 | 34 | 5  | 32 | 12:00 wind picks up          |
| 6  | 32 | 32 | 11 | 25 | 13:00 10 km/hr southeasterly |
| 8  | 28 | 29 | 16 | 27 | 14:00 ---                    |
| 10 | 20 | 24 | 18 | 19 | 15:00 ---                    |
| 10 | 15 | 20 | 18 | 16 | 16:00 ---                    |

Data Repository Table 3: Rock Surface Temperature Measurements on  
a Subrounded Granite Gneiss Boulder, January 9, 2004. These data are not reported in the manuscript.

|           | SE face   | Top face  | NW face   |
|-----------|-----------|-----------|-----------|
| Time (am) | temp (°C) | temp (°C) | temp (°C) |
| 8:35      | -6        | -7        | -4        |
| 8:38      | -7        | -8        | -4        |
| 8:40      | -7        | -8        | -4        |
| 8:45      | -7        | -8        | -4        |
| 8:50      | -7        | -3        | -4        |
| 8:55      | -6.5      | 0         | -4        |
| 9:00      | 6         | 2         | -4        |
| 9:05      | 12        | 2         | -3.5      |
| 9:10      | 15        | 3         | -3        |
| 9:15      | 16        | 3.5       | -2.5      |
| 9:20      | 16.5      | 4         | -2        |
| 9:25      | 17        | 4         | -2        |
| 9:30      | 18        | 4         | -2        |
| 9:35      | 20        | 6         | -1.5      |
| 9:40      | 21        | 6         | -1.5      |
| 9:45      | 22        | 6         | -1.5      |
| 9:50      | 22        | 7.5       | -1.5      |
| 9:55      | 23        | 8         | -1        |
| 10:00     | 23        | 8         | -1        |
| 10:05     | 23        | 8         | -1        |
| 10:10     | 22.5      | 9         | -1        |
| 10:15     | 20        | 8         | -1        |
| 10:20     | 20        | 8         | -0.5      |
| 10:22     | 17        | 6         | -0.5      |
| 10:23     | 14        | 6         | -0.5      |
| 10:24     | 13        | 6         | -0.5      |
| 10:25     | 10        | 6         | -0.5      |
| 10:26     | 9.5       | 6         | -0.5      |
| 10:27     | 9         | 6         | -0.5      |
| 10:28     | 8         | 5.5       | 0         |
| 10:29     | 8         | 5.5       | 0         |
| 10:30     | 7.5       | 5.5       | 0         |
| 10:32     | 6         | 6         | 0         |
| 10:35     | 6         | 6         | 0         |
| 10:37     | 6         | 7         | 0         |
| 10:40     | 5         | 4         | 0         |
| 10:45     | 5         | 4         | 0         |
| 10:47     | 6         | 4.5       | 0         |
| 10:48     | 7         | 5.5       | 0         |
| 10:49     | 7.5       | 6         | 0         |
| 10:50     | 8         | 6         | 0         |
| 10:51     | 8         | 7         | 0         |
| 10:52     | 8         | 7.5       | 0         |
| 10:53     | 8         | 7.5       | 0         |
| 10:54     | 9         | 7         | 0.5       |
| 10:55     | 11        | 6         | 0.5       |
| 10:57     | 15        | 4         | 0.5       |

|       |      |     |     |
|-------|------|-----|-----|
| 11:00 | 17.5 | 5   | 0.5 |
| 11:03 | 20   | 8   | 1   |
| 11:05 | 21   | 9   | 1   |
| 11:07 | 19.5 | 8.5 | 1   |

#### Notes

1. Rock dimensions: Width - 105 cm; Length - 170 cm; Height - 45 cm
2. Windiness: very light to none
3. Initially higher NW (Shaded side) temperatures attributed to radiant heat produced by large, sunlit buildings 25 m NW of boulder location; this side not illuminated during entire period of temperature measurement
4. First sunlight on top of boulder surface at 8:47 a.m.
5. First sunlight on SE side of boulder at 8:55 a.m.
6. Temporarily shaded SE side of boulder at 10:21 a.m.; re-exposed to sunlight at 10:46 a.m.
7. Wind speed moderately increased at 10:32 a.m., but gradually decreased to very light winds by 11:00 a.m.
8. Boulder top in shade of branch at 10:53 a.m., out of shade at 11:00 a.m.
9. SE side of boulder slightly shaded by branch at until 10:54 a.m.
